# Supplementary material for: Recent Advances in Search of Bioactive Secondary Metabolites from Fungi Triggered by Chemical Epigenetic Modifiers
Source: MDPI journal article supplement (doi:10.3390/jof9020172), 2023-01-28
Supplement: s1 [file s1]

## Supplementary Materials:

# Recent Advances in Search of Bioactive Secondary Metabolites from Fungi Triggered by Chemical Epigenetic Modifiers

Mengyao Xue, Xuwen Hou, Jiajin Fu, Jiayin Zhang, Jiacheng Wang, Zhitong Zhao, Dan Xu, Daowan Lai, and Ligang Zhou \*

State Key Laboratory of Agrobiotechnology, Department of Plant Pathology, College of Plant Protection, China Agricultural University, Beijing 100193, China

\* Correspondence: lgzhou@cau.edu.cn; Tel.: +86-10-6273-1199

## Contents

|                                                                                                                                                        |    |
|--------------------------------------------------------------------------------------------------------------------------------------------------------|----|
| <b>Figure S1.</b> Structures of the compounds <b>26–132</b> isolated from fungi treated with 5-azacytidine (5-Aza). ....                               | 7  |
| <b>Figure S2.</b> Structures of the compounds <b>133–138</b> isolated from fungi treated with other DNA methyltransferase modifiers. ....              | 8  |
| <b>Figure S3.</b> Structures of the compounds <b>139–149</b> isolated from fungi treated with two DNA methyltransferase modifiers. ....                | 8  |
| <b>Figure S4.</b> Structures of the compounds <b>150–290</b> isolated from fungi treated with suberoylanilide hydroxamic acid (SAHA). ....             | 14 |
| <b>Figure S5.</b> Structures of the compounds <b>291–351</b> isolated from fungi treated with suberoylbishydroxamic acid (SBHA). ....                  | 17 |
| <b>Figure S6.</b> Structures of the compounds <b>352–371</b> isolated from fungi treated with valproic acid (VAP) or sodium valproate (SVP). ....      | 18 |
| <b>Figure S7.</b> Structures of the compounds <b>372–410</b> isolated from fungi treated with sodium butyrate (NaBut). ....                            | 20 |
| <b>Figure S8.</b> Structures of the compounds <b>411–439</b> isolated from fungi treated with nicotinamide. ....                                       | 22 |
| <b>Figure S9.</b> Structures of the compounds <b>440–451</b> isolated from fungi treated with trichostatin A (TSA). ....                               | 23 |
| <b>Figure S10.</b> Structures of the compounds <b>452–462</b> isolated from fungi treated with other histone deacetylase modifiers. ....               | 24 |
| <b>Figure S11.</b> Structures of the compounds <b>463</b> and <b>464</b> isolated from fungi treated with two histone deacetylase modifiers. ....      | 24 |
| <b>Figure S12.</b> Structures of the compounds <b>465–467</b> isolated from fungi treated with histone acetyltransferase modifier anacardic acid. .... | 25 |
| <b>Figure S13.</b> Structures of the compounds <b>468–470</b> isolated from fungi treated with histone methyltransferase modifier BRD4770. ....        | 25 |

|                                                                                                                                                 |    |
|-------------------------------------------------------------------------------------------------------------------------------------------------|----|
| <b>Figure S14.</b> Structures of the compounds <b>471–475</b> isolated from fungi treated with proteasome modifier bortezomib.....              | 25 |
| <b>Figure S15.</b> Structures of the compounds <b>476–486</b> isolated from fungi treated with NPD938. ....                                     | 26 |
| <b>Figure S16.</b> Structures of the compounds <b>487–570</b> isolated from fungi treated with two types of chemical epigenetic modifiers. .... | 30 |
| <b>Table S1.</b> The examples of 5-Aza affecting production of fungal secondary metabolites. ....                                               | 31 |
| <b>Table S2.</b> The examples of SAHA affecting production of fungal secondary metabolites.....                                                 | 33 |
| <b>Table S3.</b> The examples of SBHA affecting production of fungal secondary metabolites. ....                                                | 35 |
| <b>Table S4.</b> The examples of VPA or SVP affecting production of fungal secondary metabolites.....                                           | 36 |
| <b>Table S5.</b> The examples of NaBut affecting production of fungal secondary metabolites. ....                                               | 37 |
| <b>Table S6.</b> The examples of nicotinamide affecting production of fungal secondary metabolites. ....                                        | 38 |
| <b>Table S7.</b> The examples of other histone deacetylase modifiers affecting production of fungal secondary metabolites. ....                 | 39 |
| <b>Table S8.</b> The examples of two types of chemical epigenetic modifiers affecting production of fungal secondary metabolites.....           | 40 |

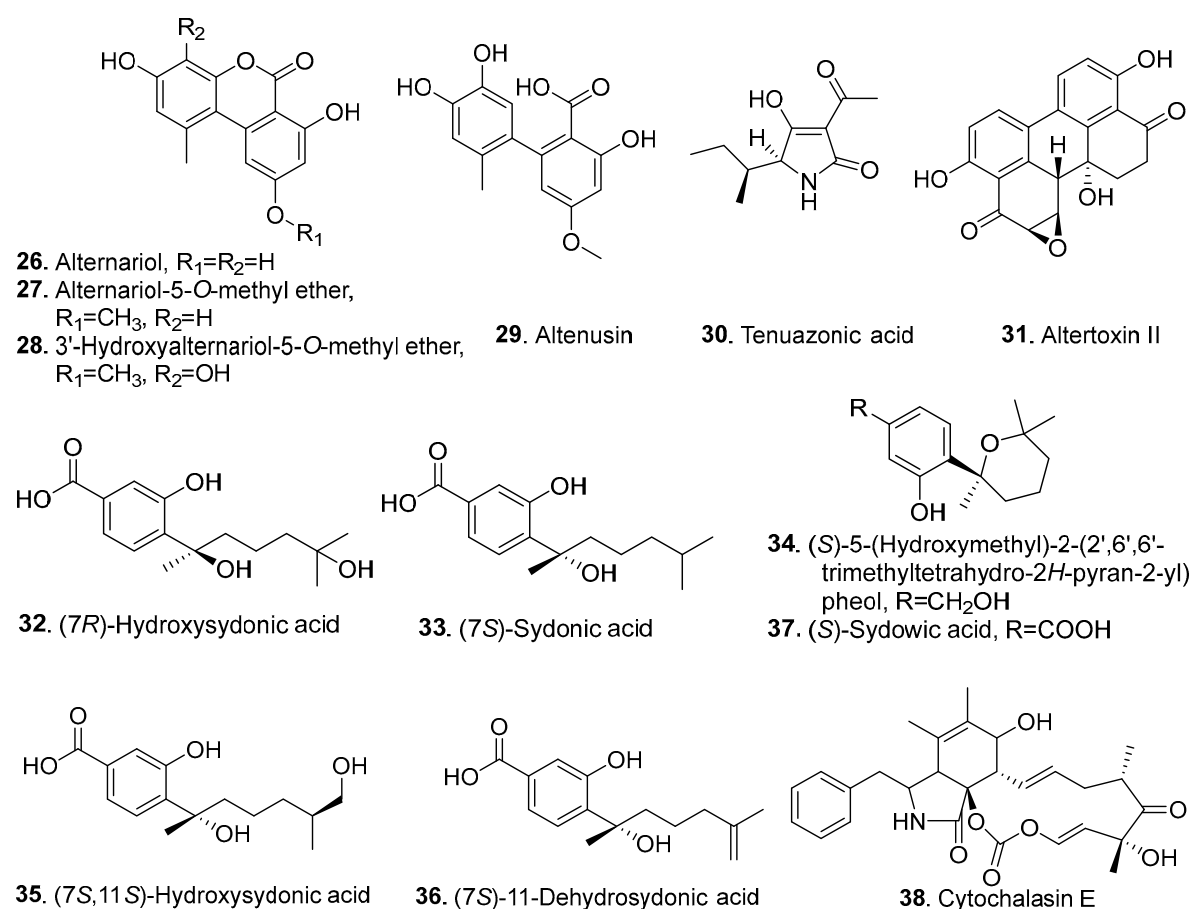

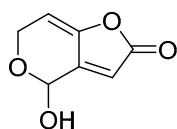

39. Patulin

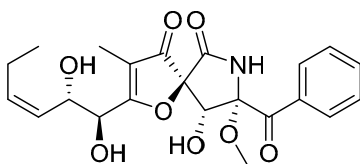

40. Pseurotin A

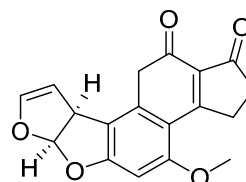

41. Aflatoxin B1

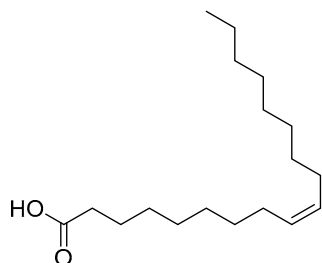

42. (Z)-9-Octadecenoic acid

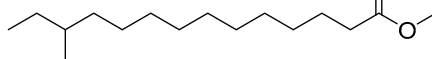

43. 12-Methyl-tetradecanoic acid methylester

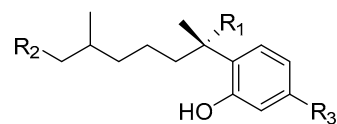44. (7S)-7-O-Methylsydonol, R<sub>1</sub>=OCH<sub>3</sub>, R<sub>2</sub>=H, R<sub>3</sub>=CH<sub>2</sub>OH45. (7S,11S)-12-Hydroxysydonic acid, R<sub>1</sub>=OH, R<sub>2</sub>=OH, R<sub>3</sub>=COOH47. (S)-Sydonol, R<sub>1</sub>=OH, R<sub>2</sub>=H, R<sub>3</sub>=CH<sub>2</sub>OH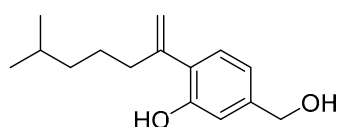

46. 7-Deoxy-7,14-didehydrosydonol

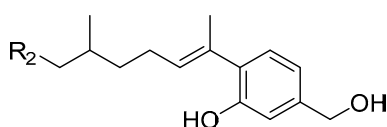

48. Anhydrowaraterpol B, R=OH

49. (E)-5-Hydroxymethyl-2-(6'-methylhept-2'-en-2'-yl)phenol, R=H

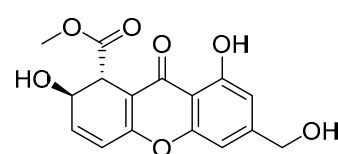

50. AGI-B4

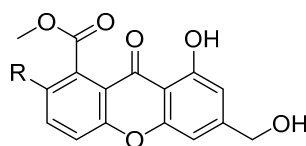

51. Sydownin A, R=H

52. Sydownin B, R=OH

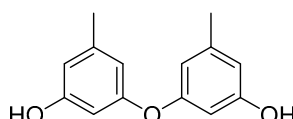

53. Diorcinol

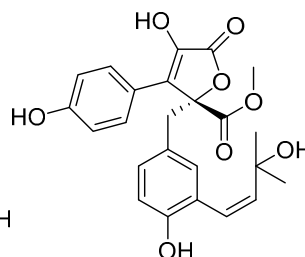

54. Asperbutyrolactone A

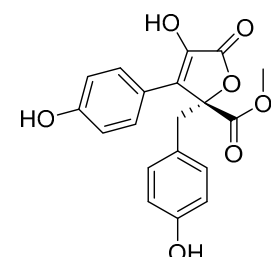

55. Asperbutyrolactone B

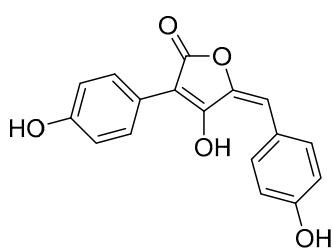

56. Aspulvinone E

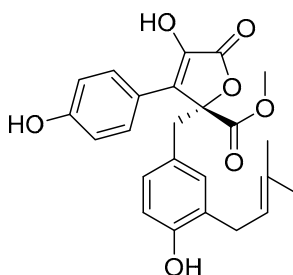

57. Butyrolactone I

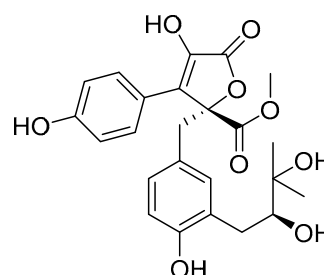

58. Butyrolactone VI

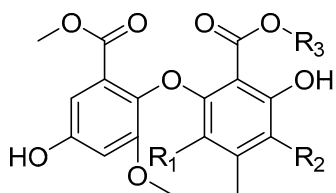

59. Asterric acid, R<sub>1</sub>=H, R<sub>2</sub>=H, R<sub>3</sub>=H  
 60. Penicillither, R<sub>1</sub>=Cl, R<sub>2</sub>=H, R<sub>3</sub>=CH<sub>3</sub>  
 61. Methyl asterrate, R<sub>1</sub>=H, R<sub>2</sub>=H, R<sub>3</sub>=CH<sub>3</sub>  
 62. 4',6',-Dichloroasterric acid, R<sub>1</sub>=Cl, R<sub>2</sub>=Cl, R<sub>3</sub>=CH<sub>3</sub>

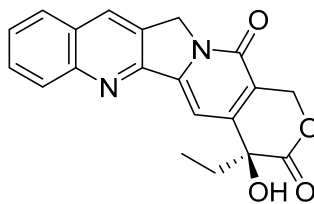

63. Camptothecin

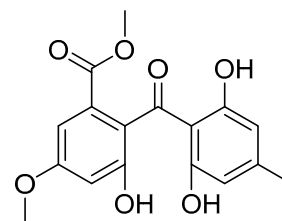

64. Isosulochrin

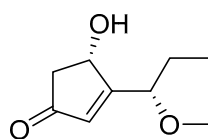

65. Globosporin A

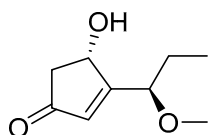

66. Globosporin B

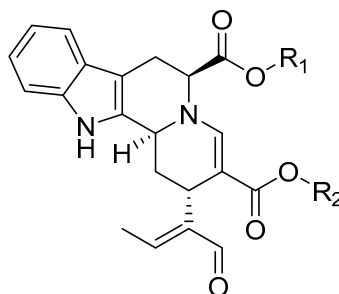

67. Globosporine C, R<sub>1</sub>=CH<sub>3</sub>, R<sub>2</sub>=H  
 69. Mappianine E, R<sub>1</sub>=H, R<sub>2</sub>=CH<sub>3</sub>

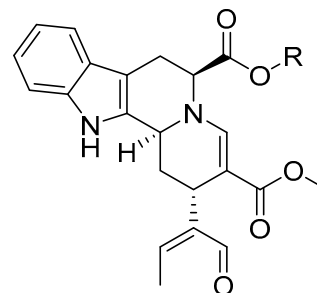

68. Globosporine D, R=H  
 70. 19(20)Z-5-Carboxymethylvallesiachotamine, R=CH<sub>3</sub>

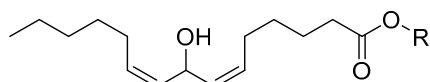

71. (9Z,12Z)-11-Hydroxyoctadeca-9,12-dienoic acid, R=H  
 72. (9Z,12Z)-11-Hydroxyoctadeca-9,12-dienoic acid, methyl ester, R=CH<sub>3</sub>  
 73. (9Z,12Z)-11-Hydroxyoctadeca-9,12-dienoic acid glycerol conjugate, R=CH<sub>2</sub>-CHOH-CH<sub>2</sub>OH

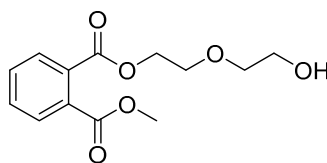

74. Cochphthester A

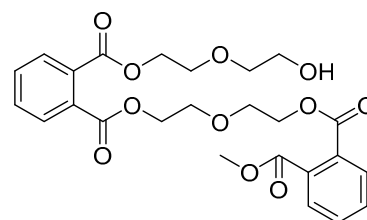

75. Cochphthester B

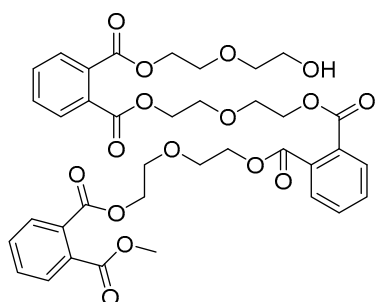

76. Cochphthester C

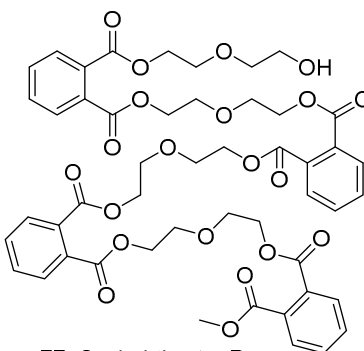

77. Cochphthester D

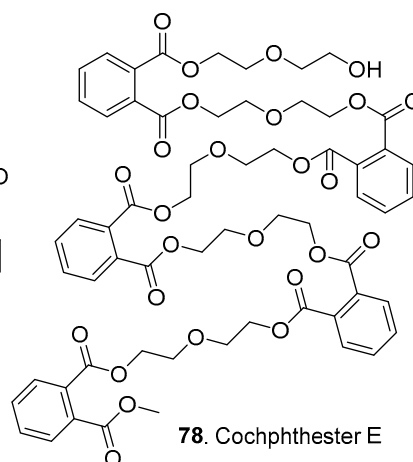

78. Cochphthester E

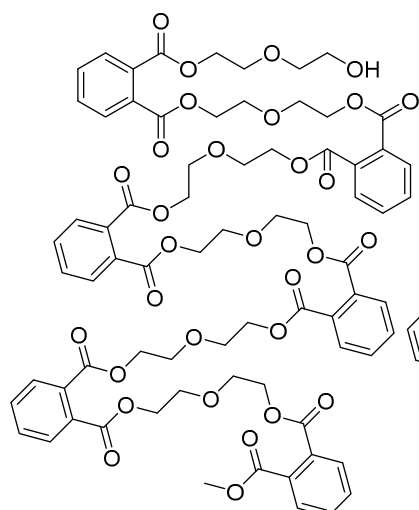**79.** Cochphthester F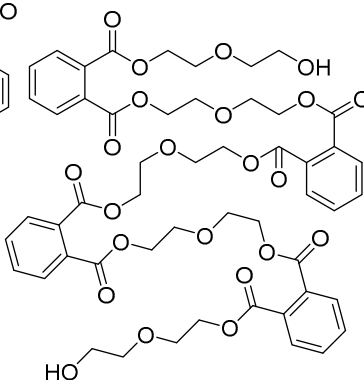**80.** Cochphthester G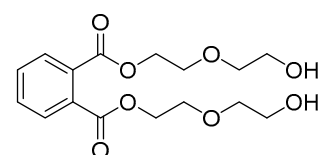**81.** 1,2-Benzenedicarboxylic acid, 1,2-bis[2-(2-hydroxyethoxy) ethyl] ester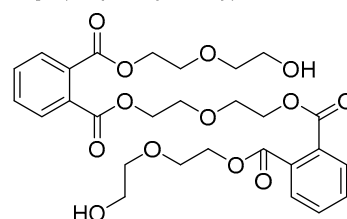**82.** 1,2-Benzenedicarboxylic acid, 1,1-(oxydi-2,1-ethanediyl) 2,2-bis[2-(2-hydroxyethoxy) ethyl] ester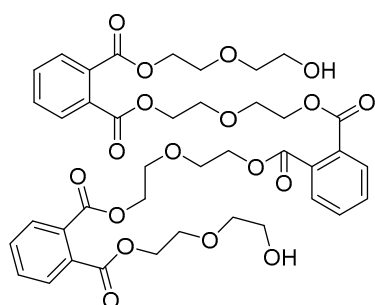**83.** 1,2-Benzenedicarboxylic acid, 1,2-bis[2-[[[2-(2-hydroxyethoxy) ethoxy] carbonyl] oxy] ethoxy] ethyl] ester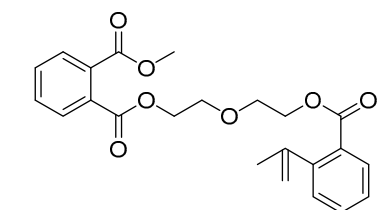**84.** 1,2-Benzenedicarboxylic acid, oxy-di-2,1-ethanediyl dimethylester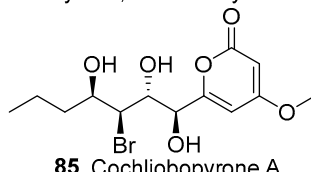**85.** Cochliobopyrone A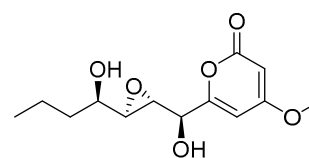**86.** Cochliobopyrone B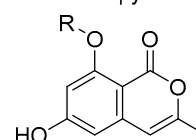**87.** 3-Methyl-6,8-dihydroxyisocoumarin, R=CH<sub>3</sub>**88.** 6-Hydroxy-8-methoxy-3-methyl-isocoumarin, R=H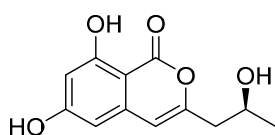**89.** (S)-Orthosporin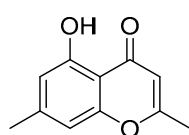**90.** Altechromone A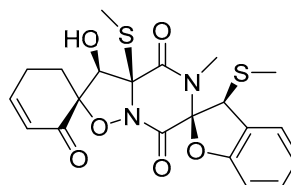**91.** Botrysosulfuranol A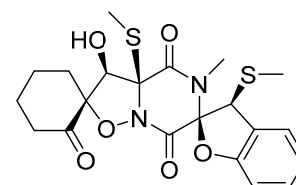**92.** Botrysosulfuranol B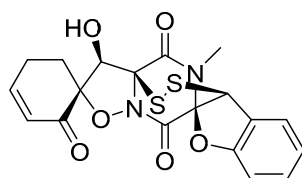**93.** Botrysosulfuranol C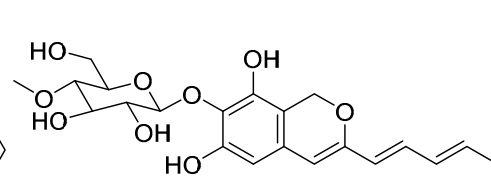**94.** Indigotide A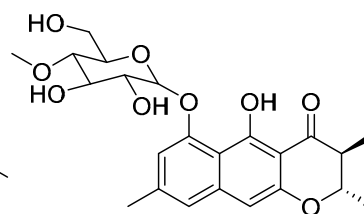**95.** Indigotide B

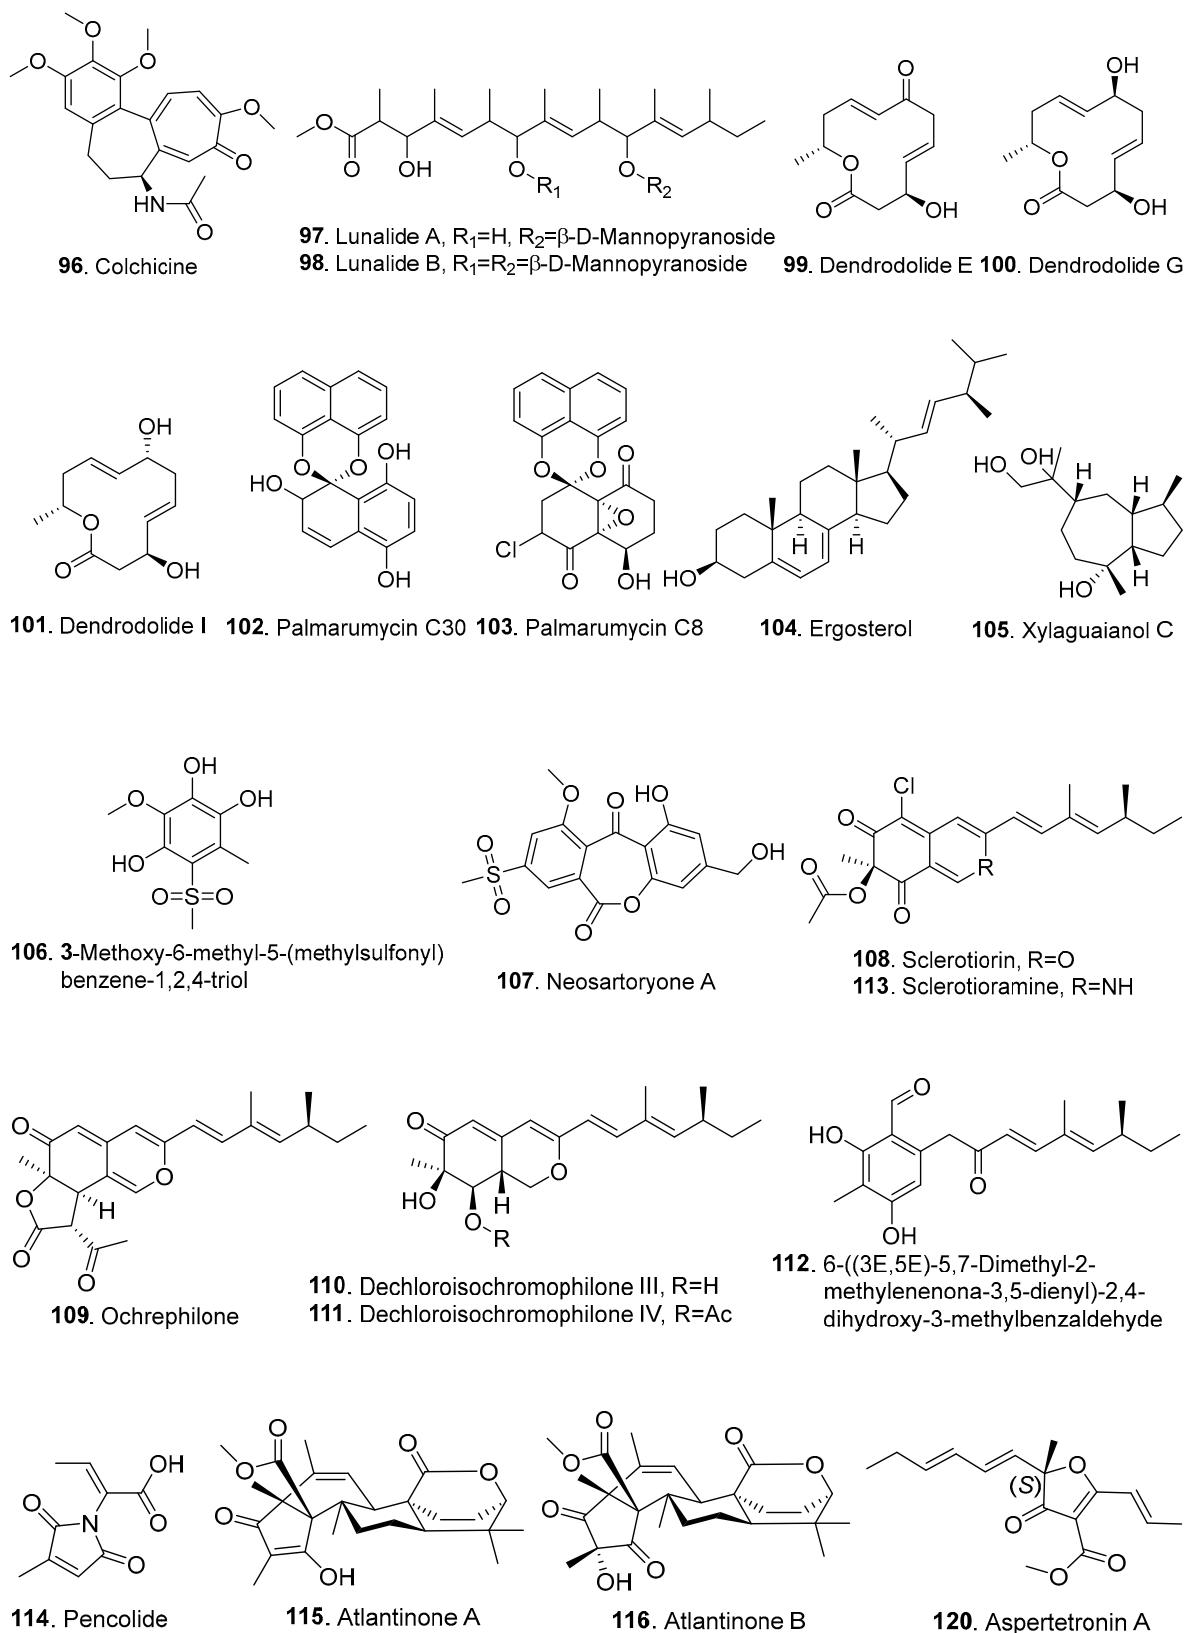

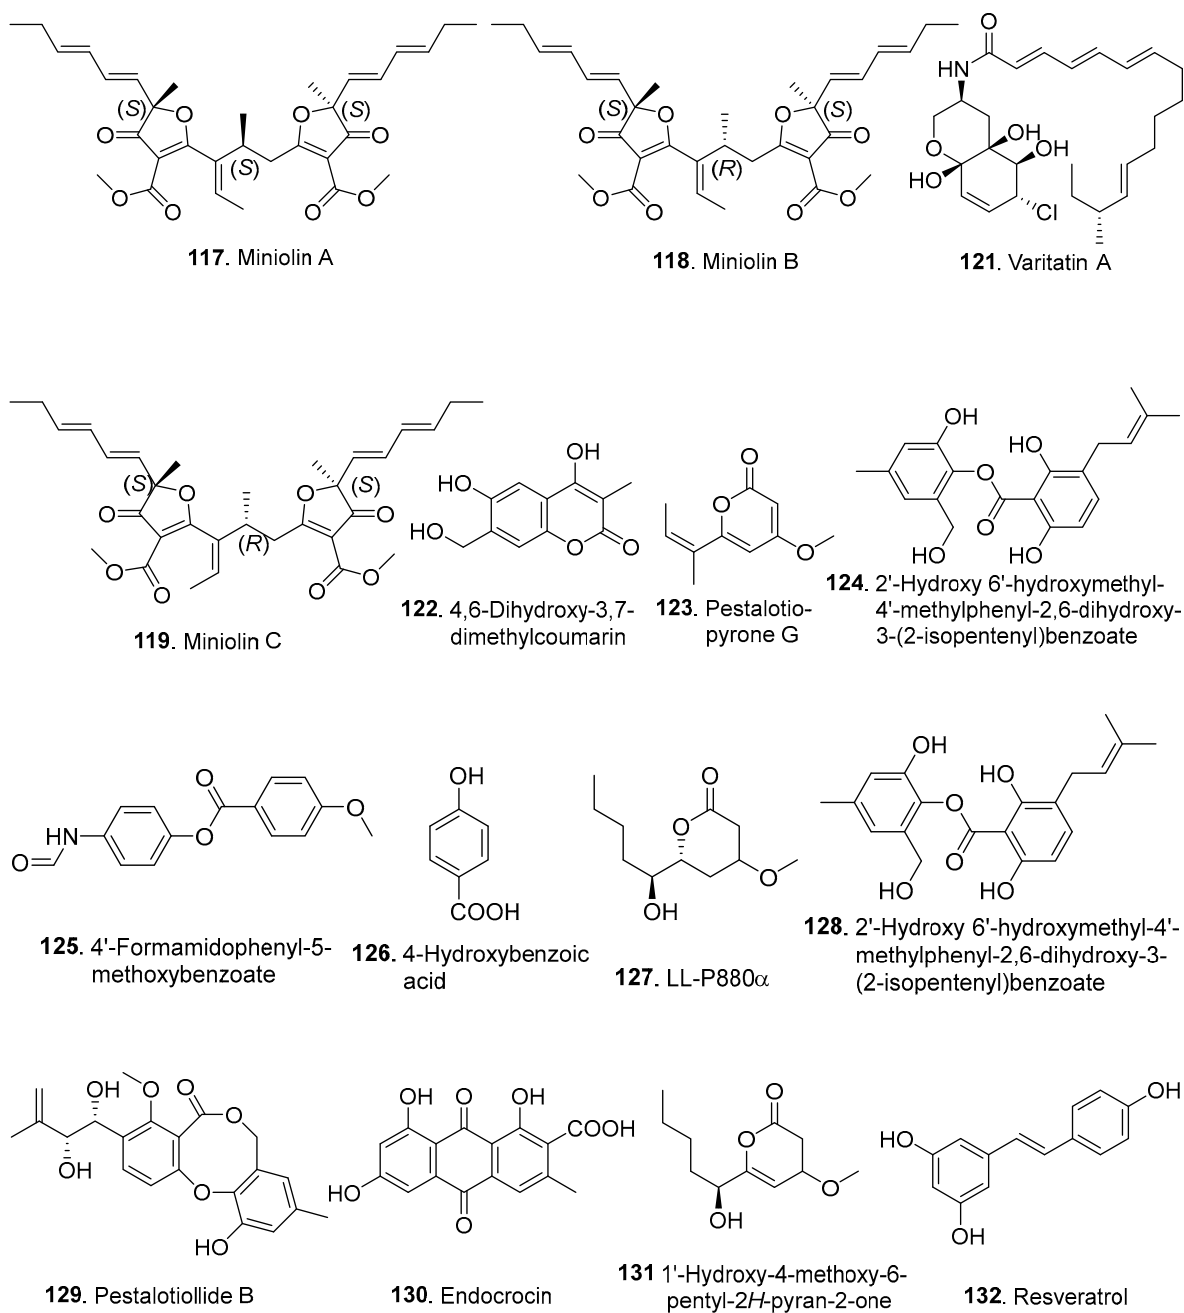

**Figure S1.** Structures of the compounds 26–132 isolated from fungi treated with 5-azacydidine (5-Aza).

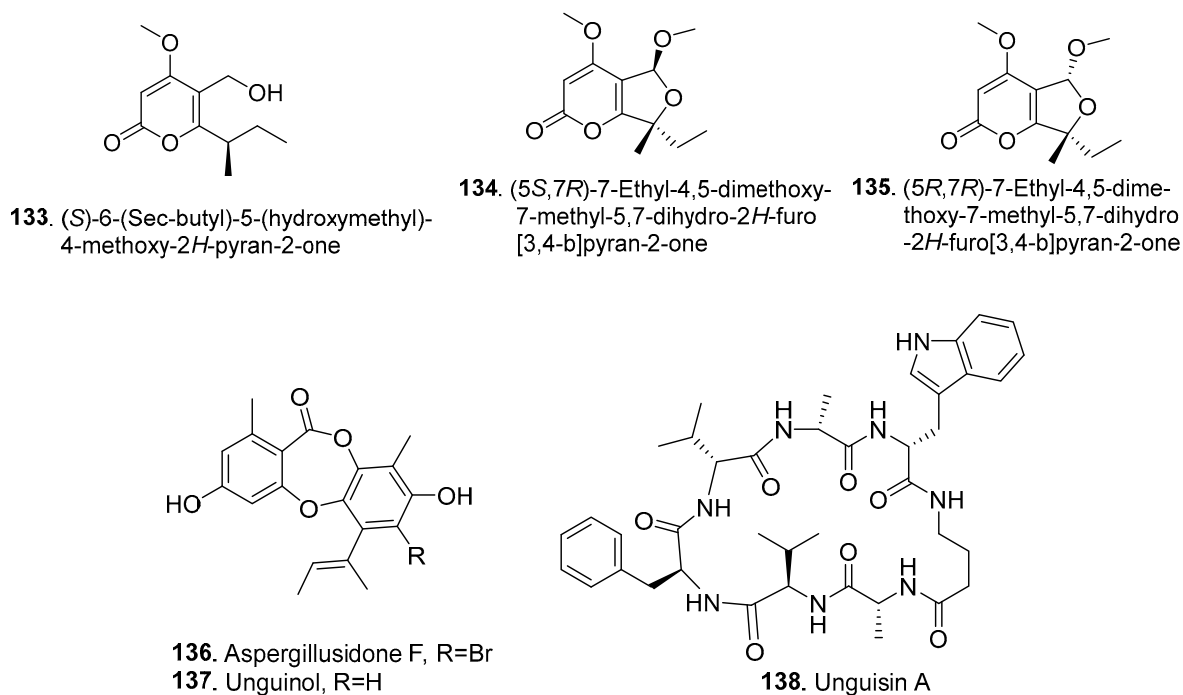

**Figure S2.** Structures of the compounds **133–138** isolated from fungi treated with other DNA methyltransferase modifiers.

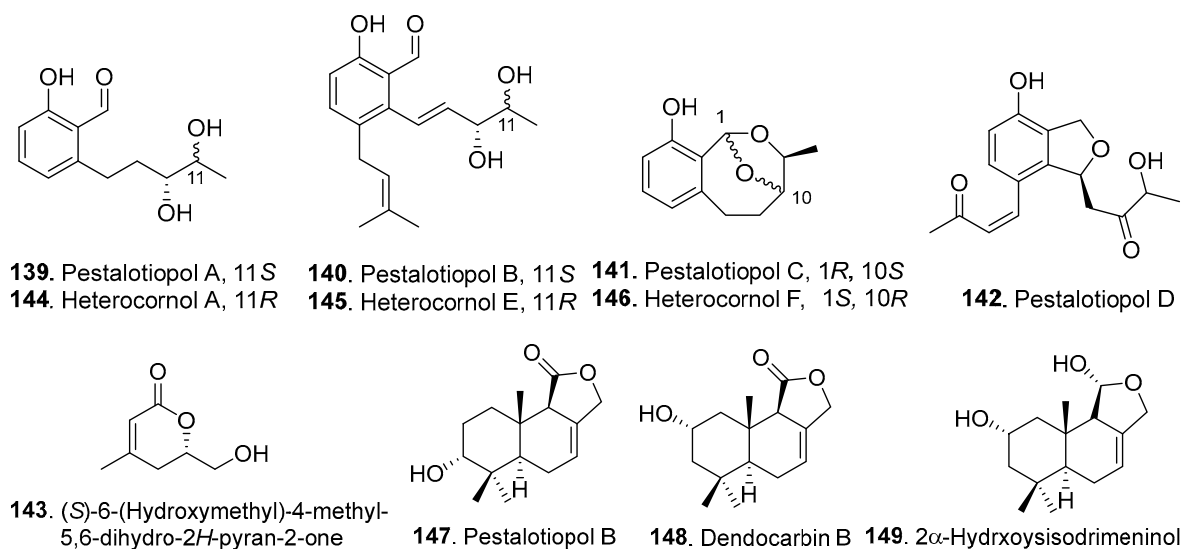

**Figure S3.** Structures of the compounds **139–149** isolated from fungi treated with two DNA methyltransferase modifiers.



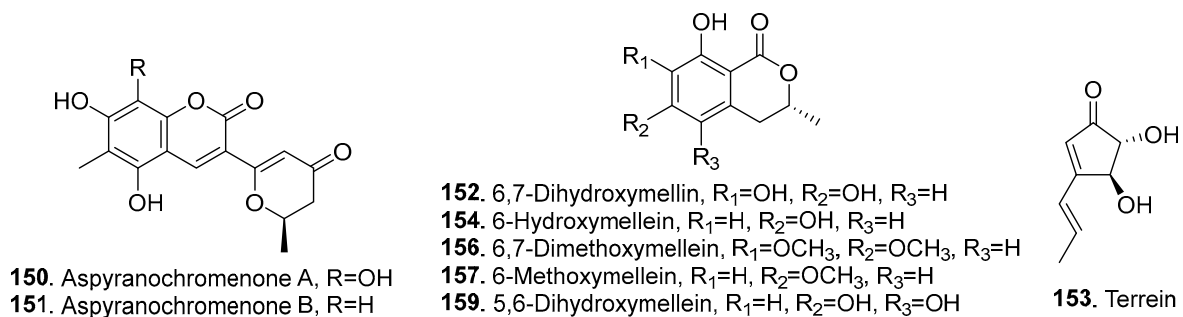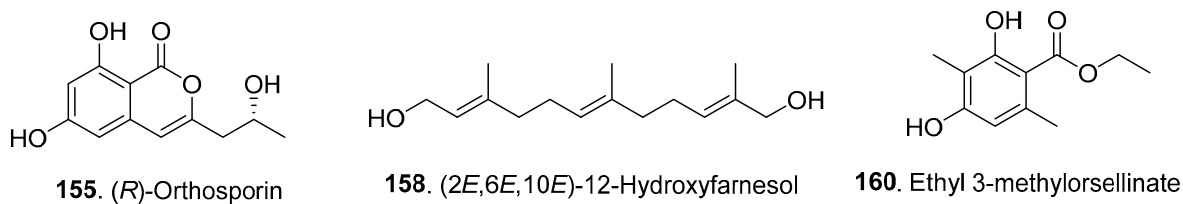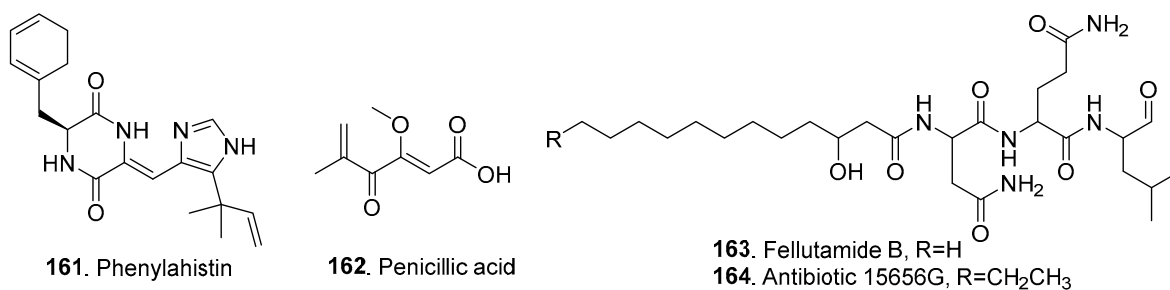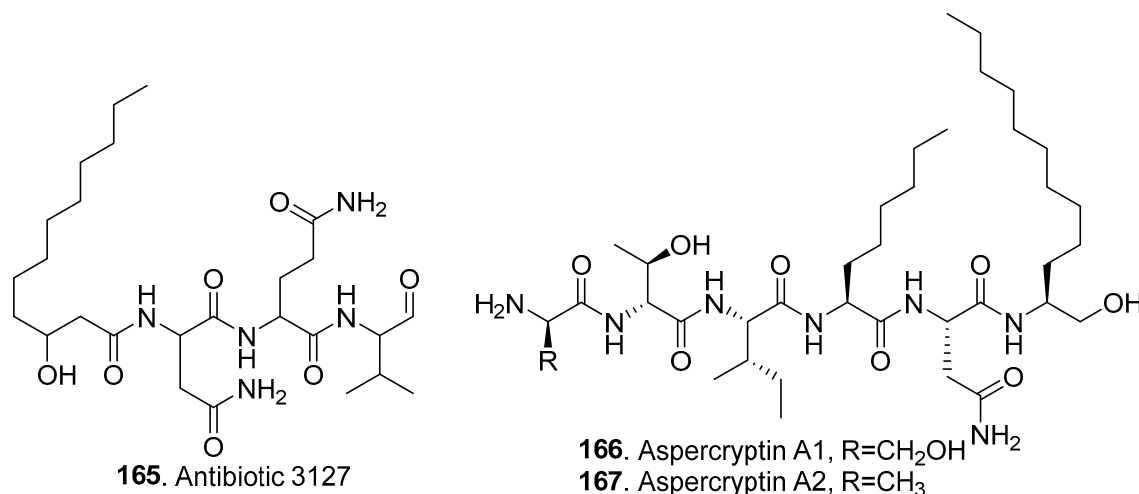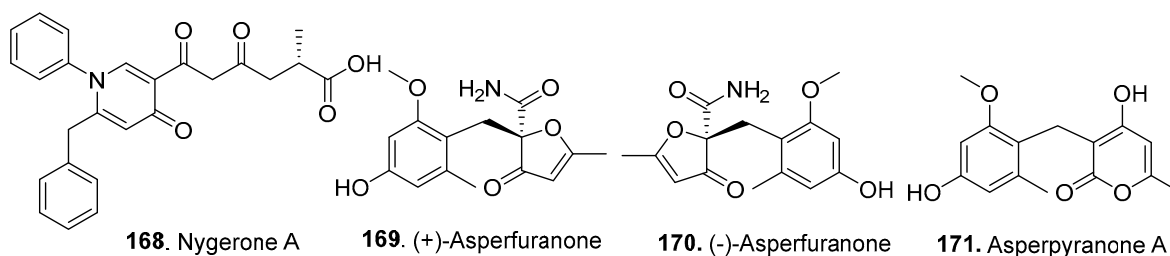

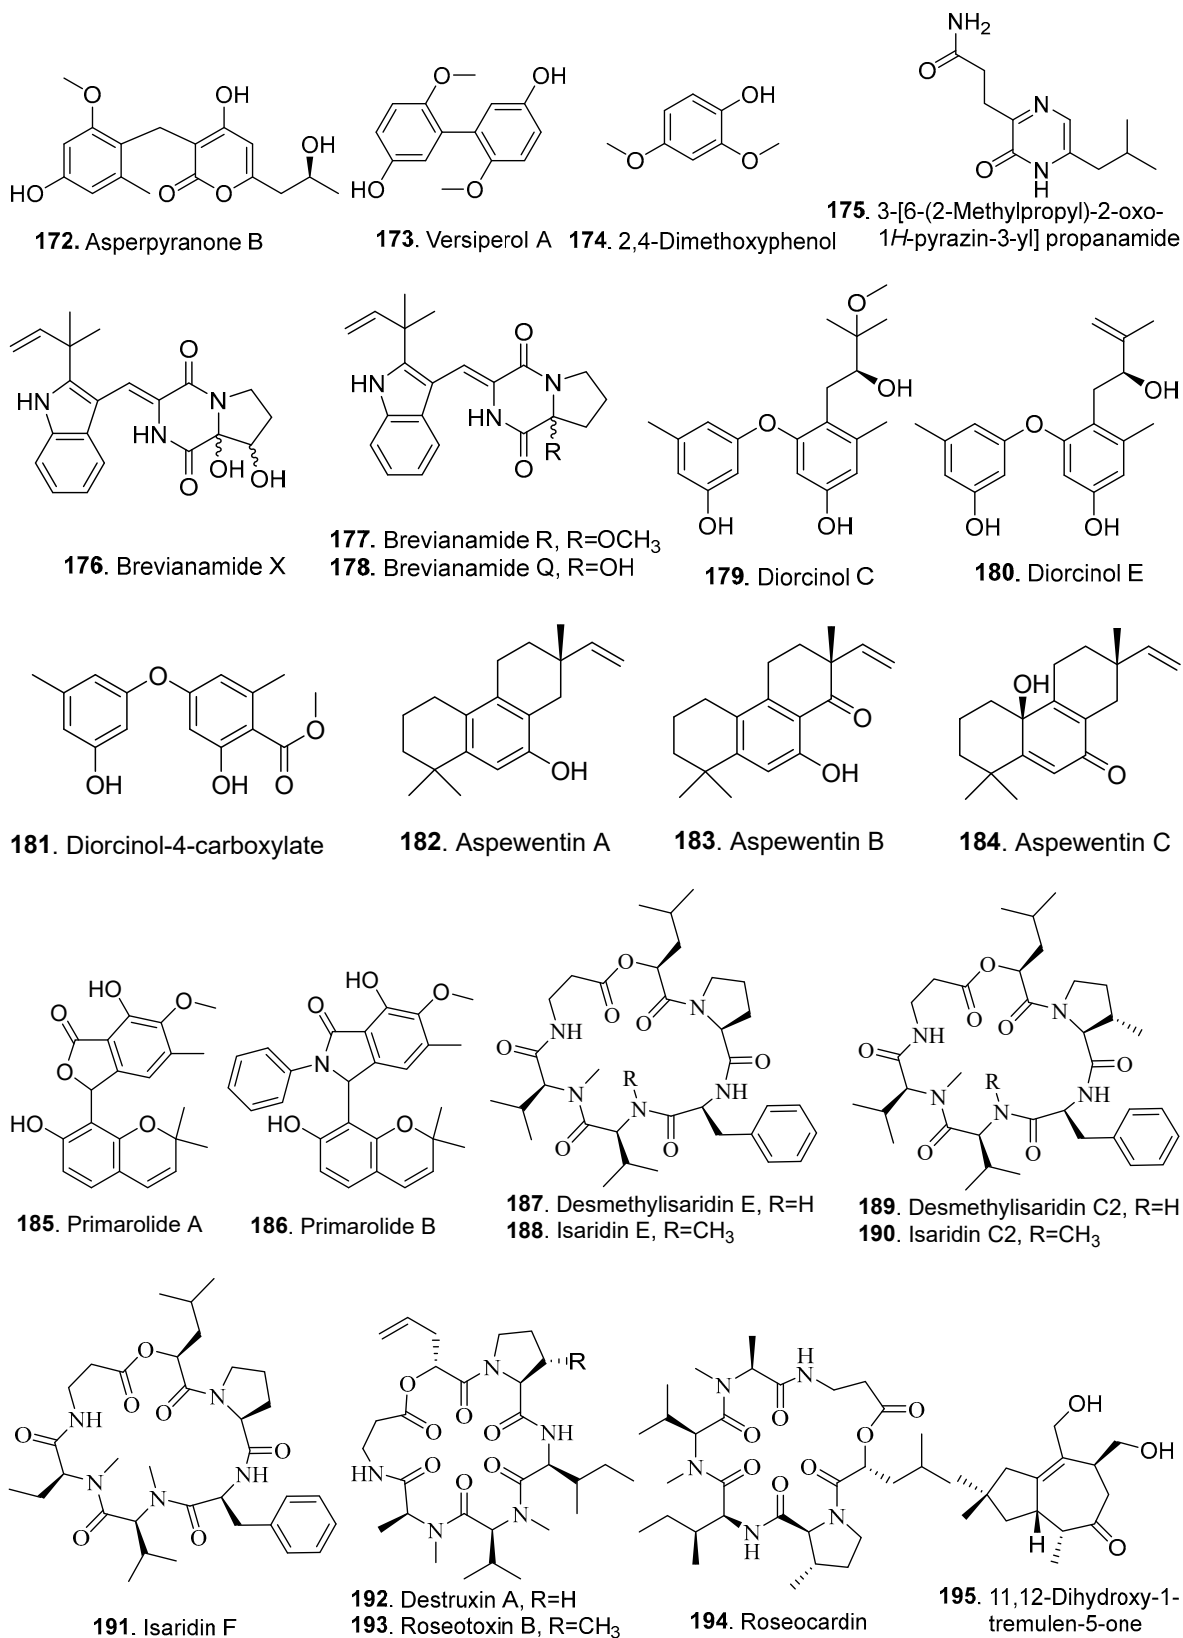

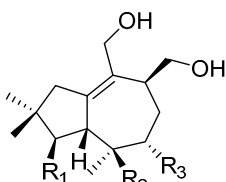

**196.** (3*S*,6*R*,7*R*)-Tremul-1-ene-6,11,12-triol,  
R<sub>1</sub>=H, R<sub>2</sub>=OH, R<sub>3</sub>=H

**197.** Ceriponol A, R<sub>1</sub>=OH, R<sub>2</sub>=H, R<sub>3</sub>=H

**198.** Conocenol B, R<sub>1</sub>=H, R<sub>2</sub>=H, R<sub>3</sub>=OH

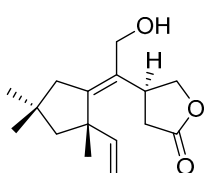

**199.** Conocenolide A

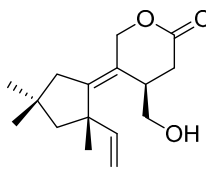

**200.** Conocenolide B

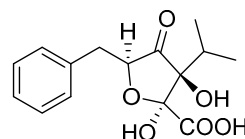

**201.** Botrycinereic acid

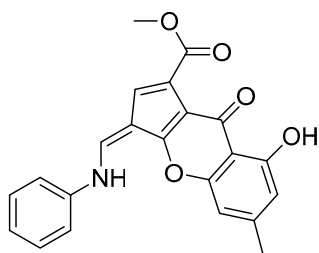

**202.** Chalaniline A

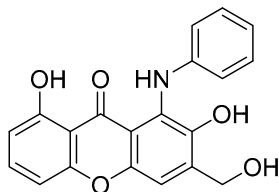

**203.** Chalaniline B

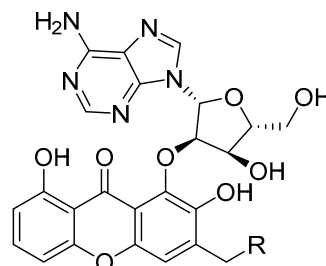

**204.** Xanthone A, R=H

**205.** Xanthone B, R=OH

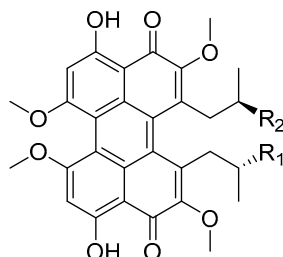

**206.** Cladochrome F, R<sub>1</sub>=OH, R<sub>2</sub>=*p*-Hydroxybenzoate

**207.** Cladochrome G, R<sub>1</sub>=OH, R<sub>2</sub>=*p*-Hydroxycarbonate

**208.** Cladochrome A, R<sub>1</sub>=R<sub>2</sub>=*β*-Hydroxycarbonate

**209.** Cladochrome B, R<sub>1</sub>=*β*-Hydroxybutyrate, R<sub>2</sub>=Benzoate

**210.** Cladochrome D, R<sub>1</sub>=*p*-Hydroxybutyrate, R<sub>2</sub>=*p*-Hydroxybenzoate

**211.** Cladochrome E, R<sub>1</sub>=*p*-Hydroxycarbonate, R<sub>2</sub>=Benzoate

**212.** Calphostin B, R<sub>1</sub>=OH, R<sub>2</sub>=Benzoate

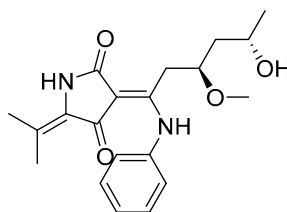

**213.** Cladosin H

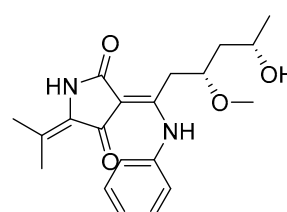

**214.** Cladosin I

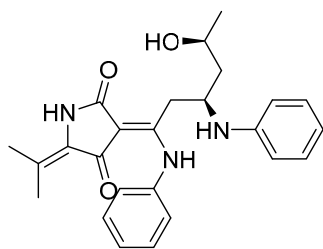

**215.** Cladosin J

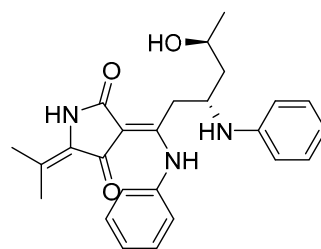

**216.** Cladosin K

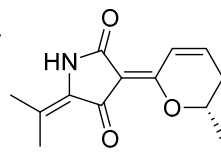

**217.** Cladodionen

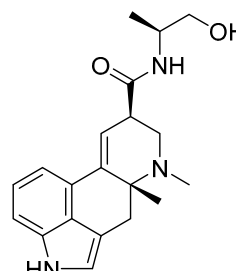

**218.** Ergometrine

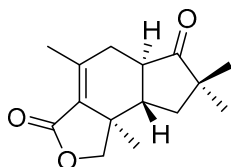

**219.** Cystercorolide

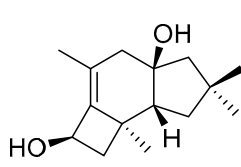

**220.** Cystercorodiol A

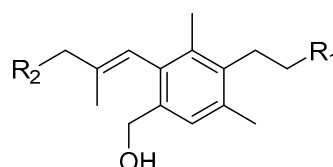

**221.** 4-O-Acetylcybroadol, R<sub>1</sub>=OAc, R<sub>2</sub>=OH

**222.** 14-Dehydroxybroadol, R<sub>1</sub>=OH, R<sub>2</sub>=H

**231.** Cybroadol, R<sub>1</sub>=OH, R<sub>2</sub>=OH

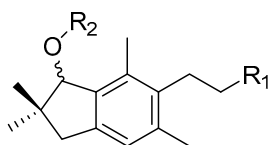**223.** Cystercorodiol B,  $R_1=OH$ ,  $R_2=H$ **224.** 4-O-Acetylcystercorodiol B,  $R=OAc$ ,  $R_2=H$ **225.** 1-O-Methoxycystercorodiol B,  $R_1=OH$ ,  $R_2=CH_3$ 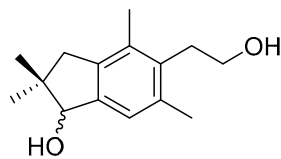**226.** Cystercorodiol C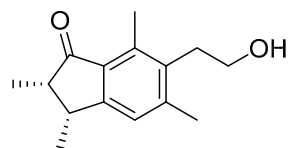**227.** Cystercorotone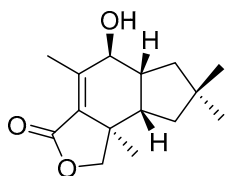**228.** Epicoterpene D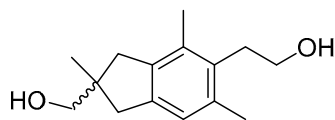**229.** Russujaponol F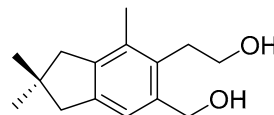**230.** Riparol B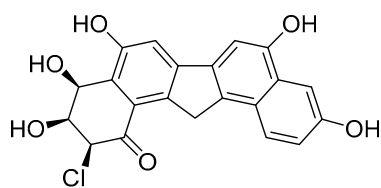**232.** Daldinone E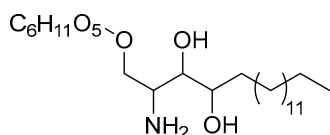**233.** Hexosylphytylphosphingosine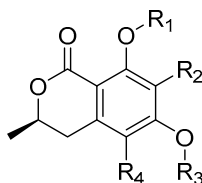**234.** Palmaerone A,  $R_1=CH_3$ ,  $R_2=H$ ,  $R_3=H$ ,  $R_4=H$ **235.** Palmaerone B,  $R_1=CH_3$ ,  $R_2=Br$ ,  $R_3=H$ ,  $R_4=H$ **236.** Palmaerone C,  $R_1=CH_3$ ,  $R_2=Br$ ,  $R_3=CH_3$ ,  $R_4=H$ **237.** Palmaerone D,  $R_1=H$ ,  $R_2=Br$ ,  $R_3=H$ ,  $R_4=H$ **238.** Palmaerone E,  $R_1=CH_3$ ,  $R_2=OH$ ,  $R_3=H$ ,  $R_4=Br$ **239.** Palmaerone F,  $R_1=CH_3$ ,  $R_2=H$ ,  $R_3=H$ ,  $R_4=Cl$ **240.** Palmaerone G,  $R_1=CH_3$ ,  $R_2=Cl$ ,  $R_3=H$ ,  $R_4=H$ **241.** (R)-5-Cholro-6-hydroxymellein,  
 $R_1=H$ ,  $R_2=H$ ,  $R_3=H$ ,  $R_4=Cl$ **243.** Palmaerin A,  $R_1=CH_3$ ,  $R_2=Cl$ ,  $R_3=H$ ,  $R_4=Cl$ **244.** Palmaerin B,  $R_1=H$ ,  $R_2=Br$ ,  $R_3=H$ ,  $R_4=Br$ **245.** Palmaerin D,  $R_1=H$ ,  $R_2=H$ ,  $R_3=H$ ,  $R_4=Br$ 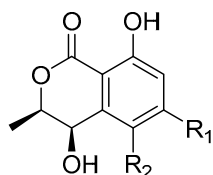**242.** (3R,4R)-5-Cholro-4,6-dihydroxymellein,  $R_1=OH$ ,  $R_2=Cl$ **247.** cis-4-Hydroxymellein,  $R_1=H$ ,  $R_2=H$ 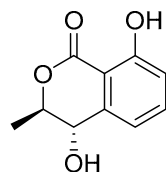**246.** trans-4-Hydroxymellein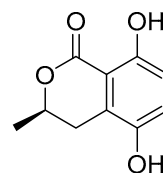**248.** (R)-5-hydroxymellein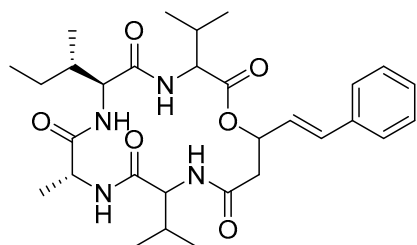**249.** EGM-556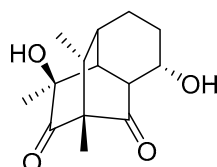**250.** 4-Epipenicillone B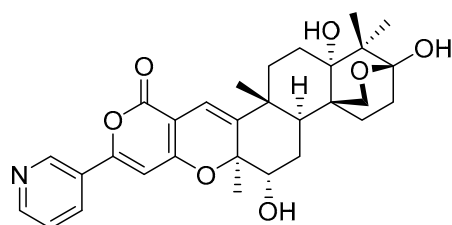**252.** Pyrandecarurin A

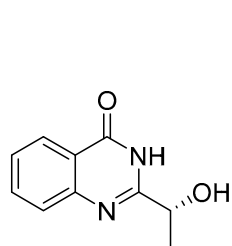**251.** (*R*)-Chrysogine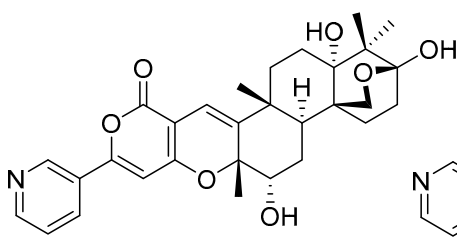**253.** Pyrandecarurin B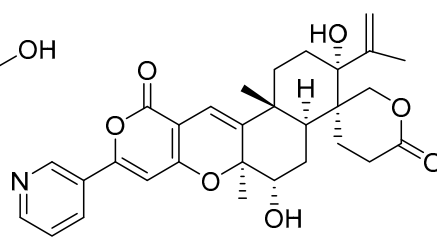**254.** Pileotin A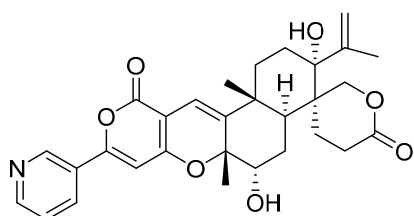**255.** Pileotin B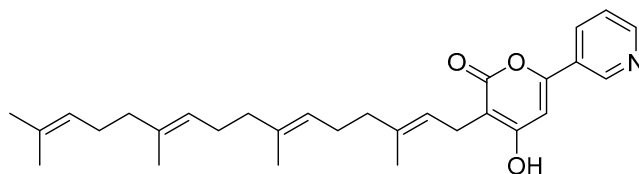**256.** Decaturenoid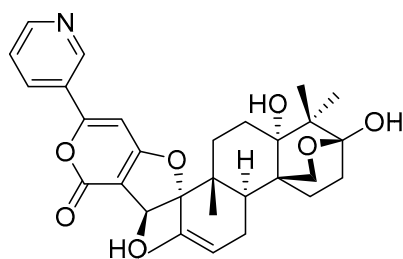**257.** 15-Hydroxydecaturin A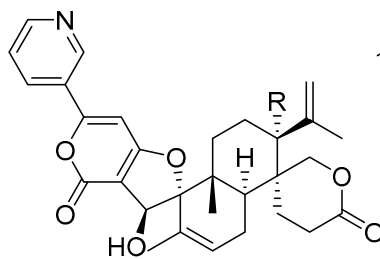**258.** Oxalicine A, R=H**259.** Oxalicine B, R=OH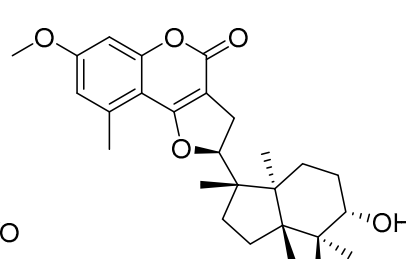**260.** Penisarin B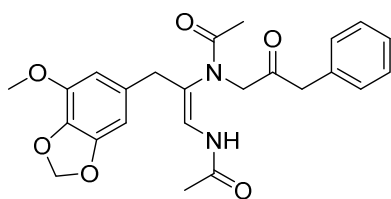**261.** Brasiliamide A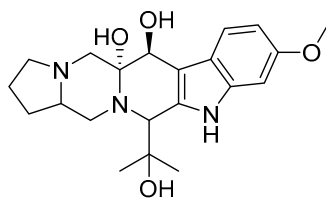**262.** Verruculogen TR2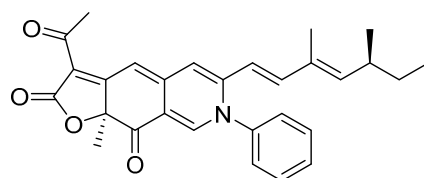**263.** Isochromophilone XIV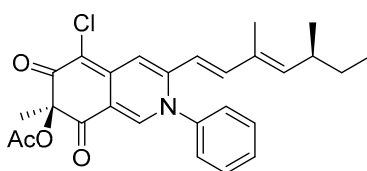**264.** Isochromophilone XV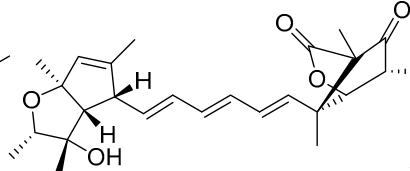**265.** Varilactone A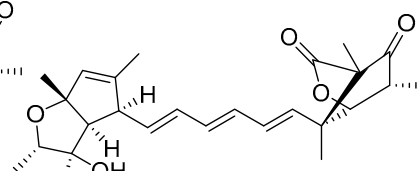**266.** Varilactone B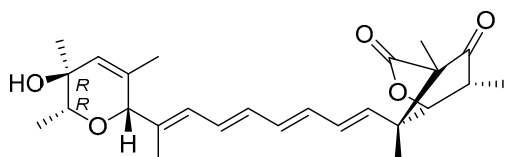**267.** Wortmannilactone M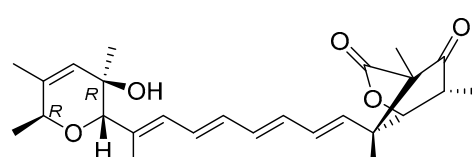**268.** Wortmannilactone N

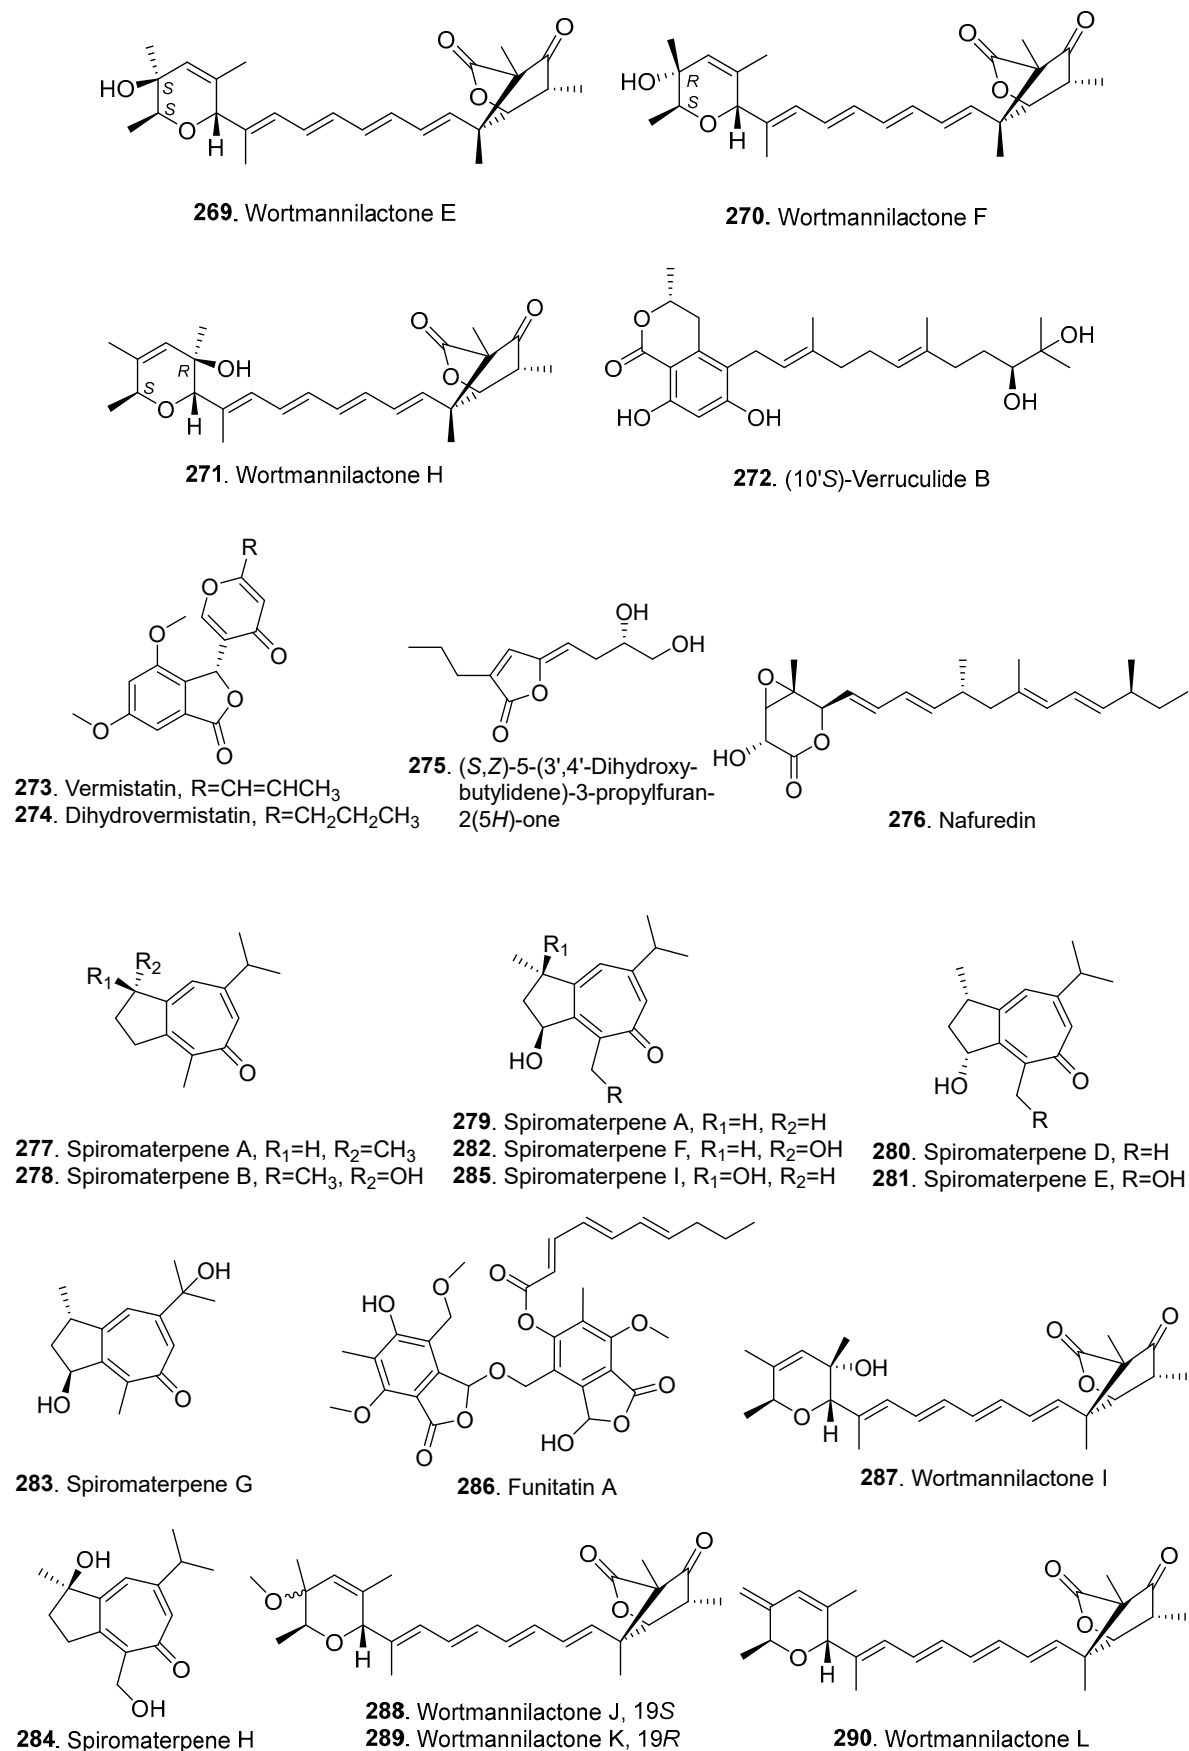

**Figure S4.** Structures of the compounds **150–290** isolated from fungi treated with suberoylanilide hydroxamic acid (SAHA).

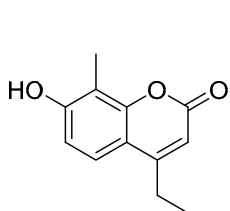

**291.** 4-Ethyl-7-hydroxy-8-methyl-2H-1-benzopyran-2-one

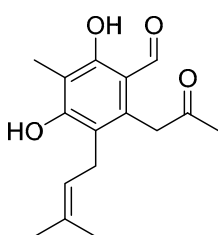

**292.** Chaetophenol A

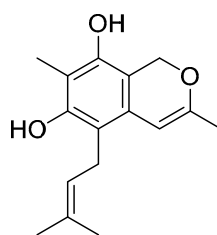

**293.** Chaetophenol B

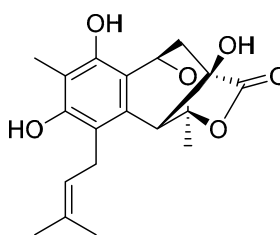

**294.** Chaetophenol C

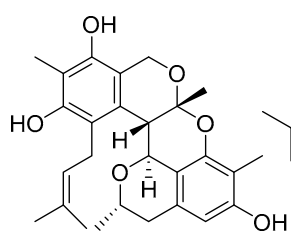

**295.** Chaetophenol D

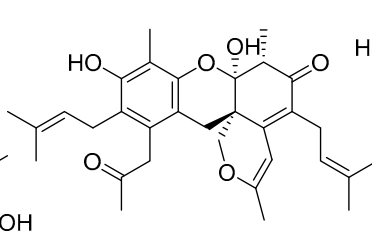

**296.** Chaetophenol E

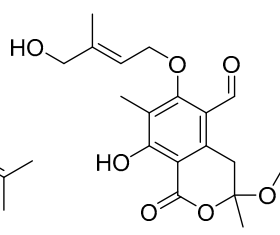

**297.** Chaetophenol F

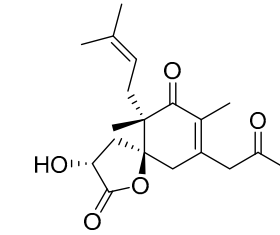

**298.** Spiroindicumide A

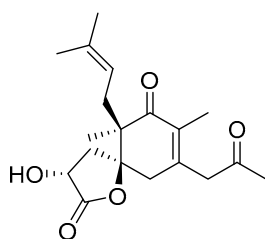

**299.** Spiroindicumide B

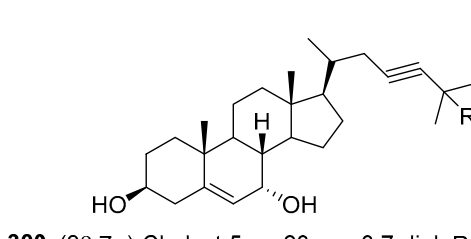

**300.** (3β,7α)-Cholest-5-en-23-yne-3,7-diol, R=H

**301.** (3β,7α)-Cholest-5-en-23-yne-3,7,25-triol, R=OH

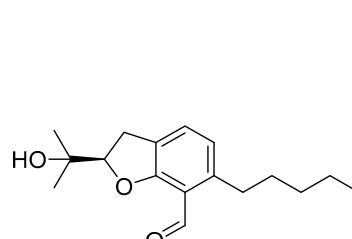

**302.** Annullatin A

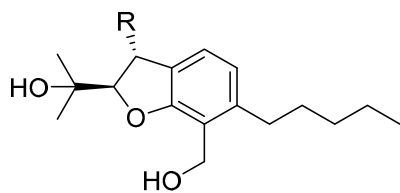

**303.** Annullatin B, R=H

**304.** Annullatin C, R=OH

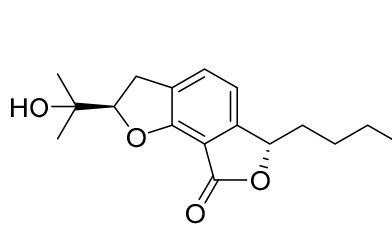

**305.** Annullatin D

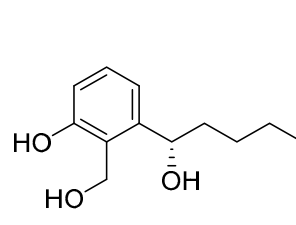

**306.** Annullatin E

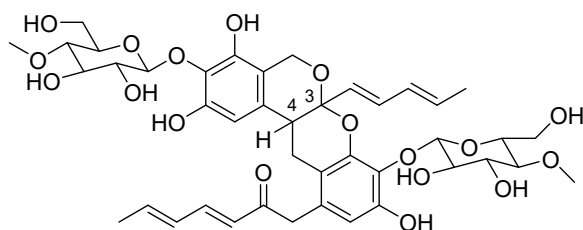

**307.** Indigotide C, 3R, 4R

**308.** Indigotide D, 3S, 4S

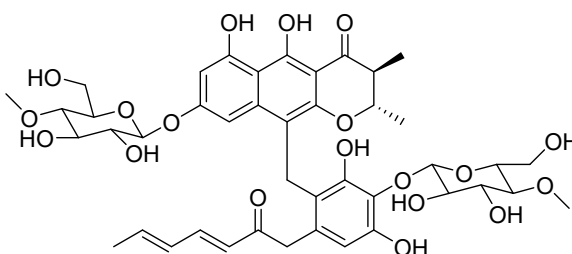

**309.** Indigotide E

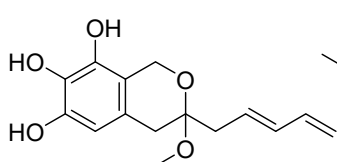

**310.** Indigotide F

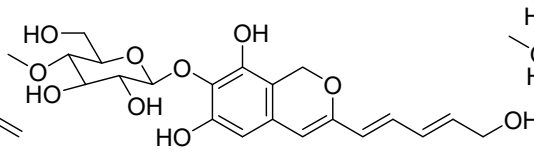

**311.** 13-Hydroxyindigotide A

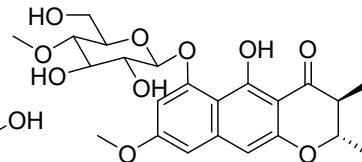

**312.** 8-O-Methylindigotide B

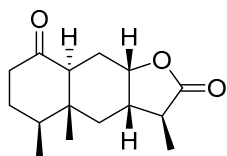

313. Eutyperemophilane A

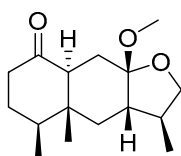

314. Eutyperemophilane B

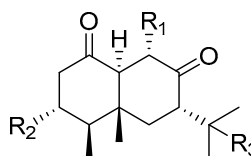315. Eutyperemophilane C,  $R_1=R_2=R_3=H$ 316. Eutyperemophilane D,  $R_1=R_2=H$ ,  $R_3=OH$ 317. Eutyperemophilane E,  $R_1=R_3=H$ ,  $R_2=OH$ 318. Eutyperemophilane F,  $R_1=OH$ ,  $R_2=R_3=H$ 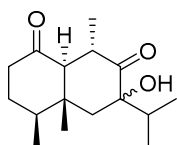319. Eutyperemophilane G,  $\cdots OH$ 320. Eutyperemophilane H,  $\blacktriangle OH$ 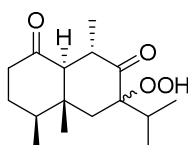321. Eutyperemophilane I,  $\cdots OOH$ 322. Eutyperemophilane J,  $\blacktriangle OOH$ 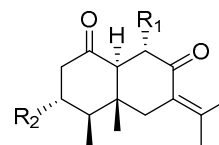323. Eutyperemophilane K,  $R_1=R_2=H$ 324. Eutyperemophilane L,  $R_1=OH$ ,  $R_2=H$ 325. Eutyperemophilane M,  $R_1=H$ ,  $R_2=OH$ 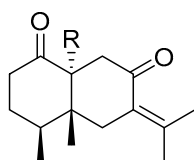326. Eutyperemophilane N,  $R=H$ 327. Eutyperemophilane O,  $R=OH$ 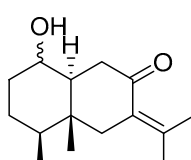328. Eutyperemophilane P,  $\blacktriangle OH$ 329. Eutyperemophilane Q,  $\cdots OH$ 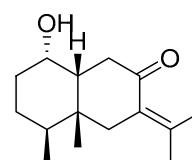

330. Eutyperemophilane R

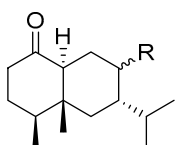331. Eutyperemophilane S,  $\blacktriangle OH$ 332. Eutyperemophilane T,  $\cdots OH$ 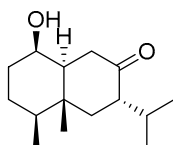

333. Eutyperemophilane U

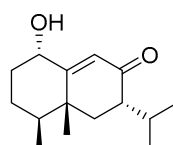

334. Eutyperemophilane V

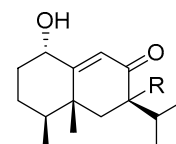335. Eutyperemophilane W,  $R=H$ 336. Eutyperemophilane X,  $R=OH$ 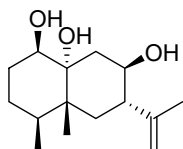

337. Eutyperemophilane Y

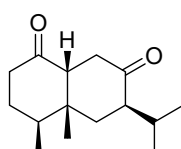

338. Eutyperemophilane Z

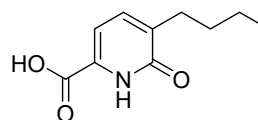

339. 5-Butyl-6-oxo-1,6-dihydropyridine-2-carboxylic acid

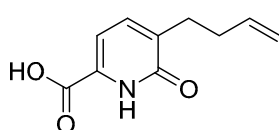

340. 5-(But-9-enyl)-6-oxo-1,6-dihydropyridine-2-carboxylic acid.

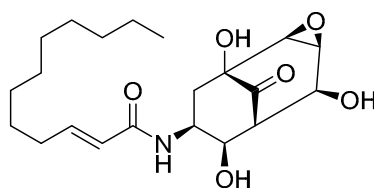

341. Isariotin A

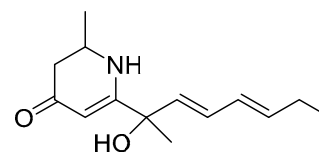

342. JBIR-54



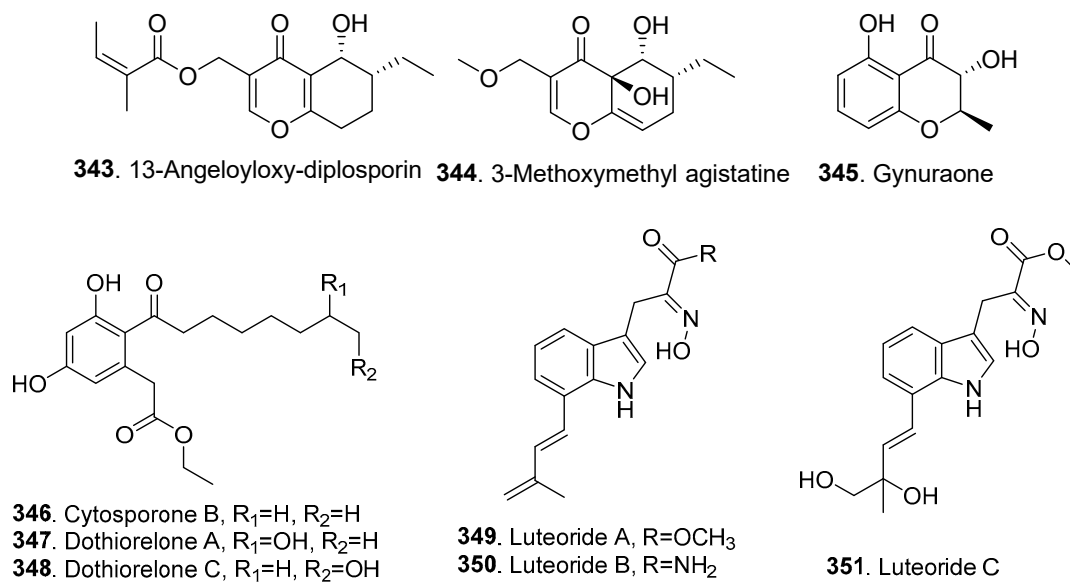

**Figure S5.** Structures of the compounds **291–351** isolated from fungi treated with suberoylbishydroxamic acid (SBHA).

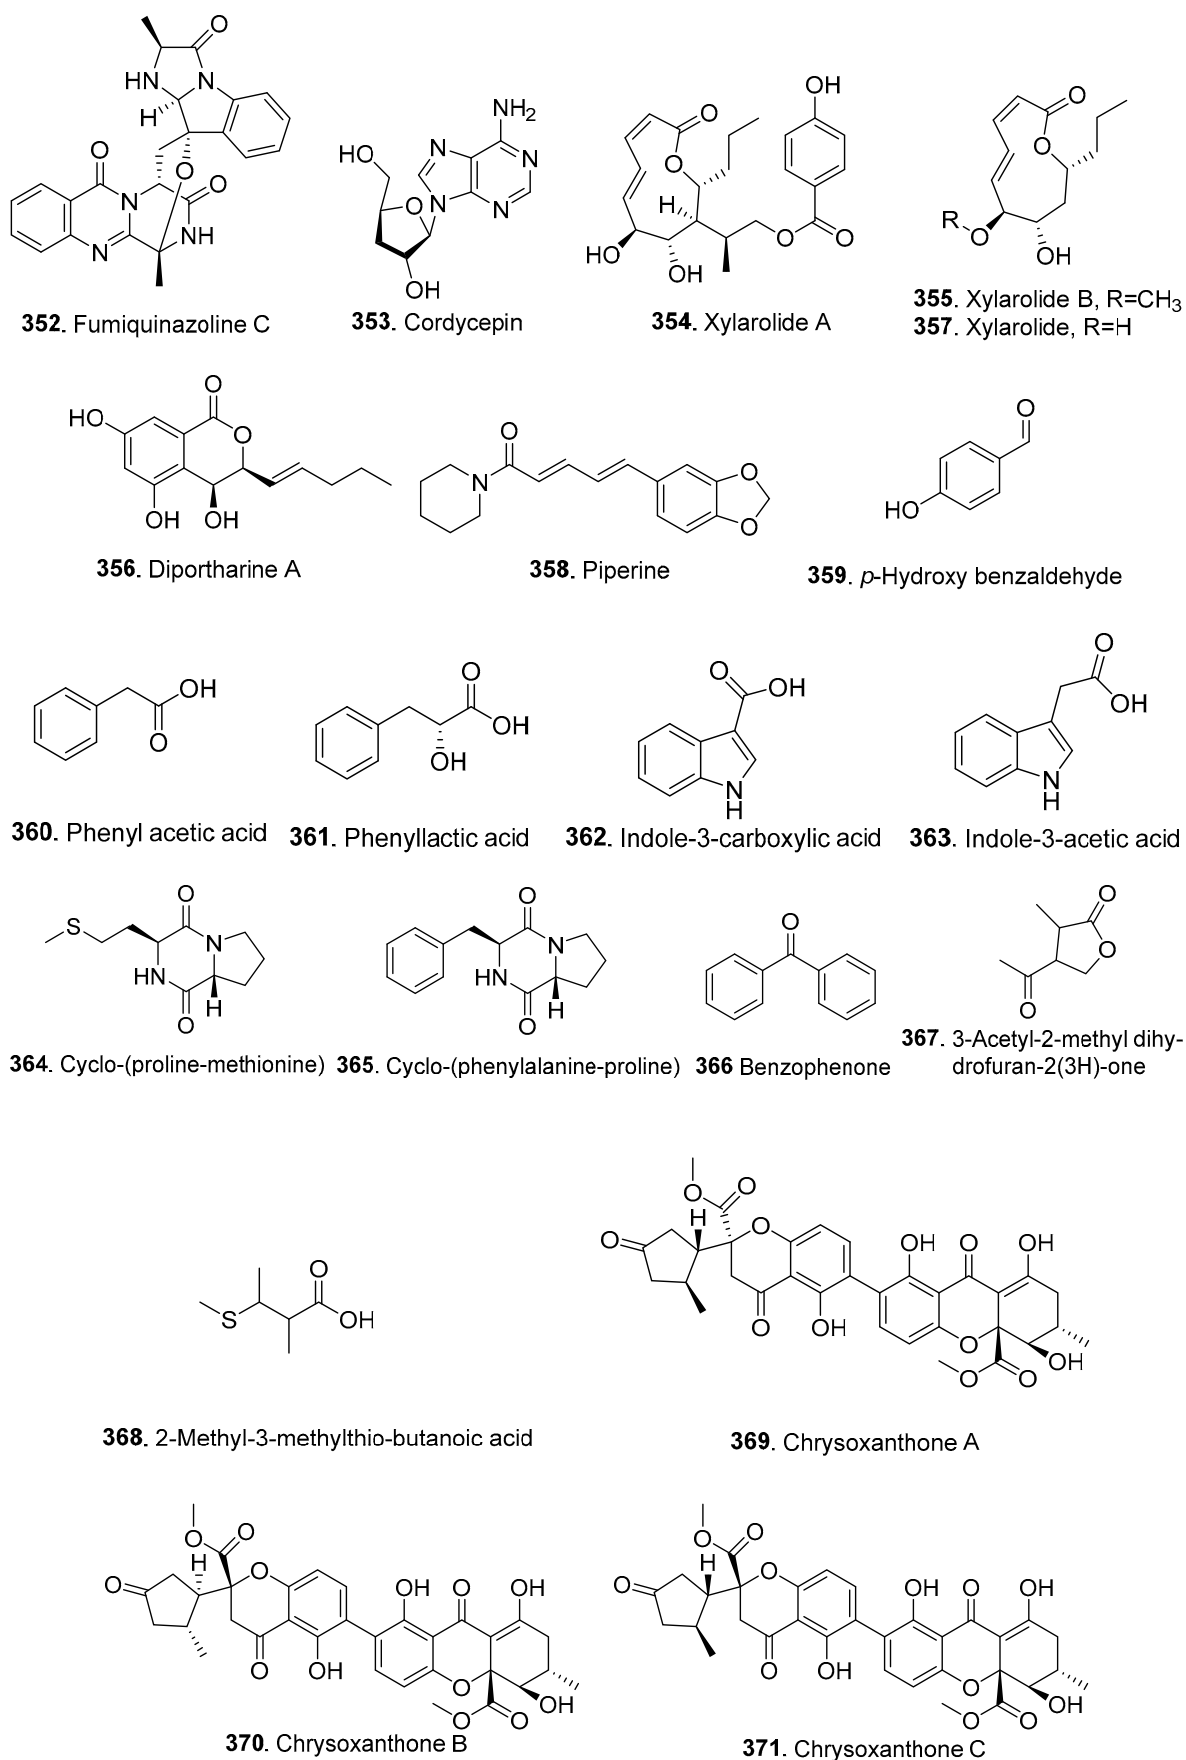

**Figure S6.** Structures of the compounds **352–371** isolated from fungi treated with valproic acid (VAP) or sodium valproate (SVP).

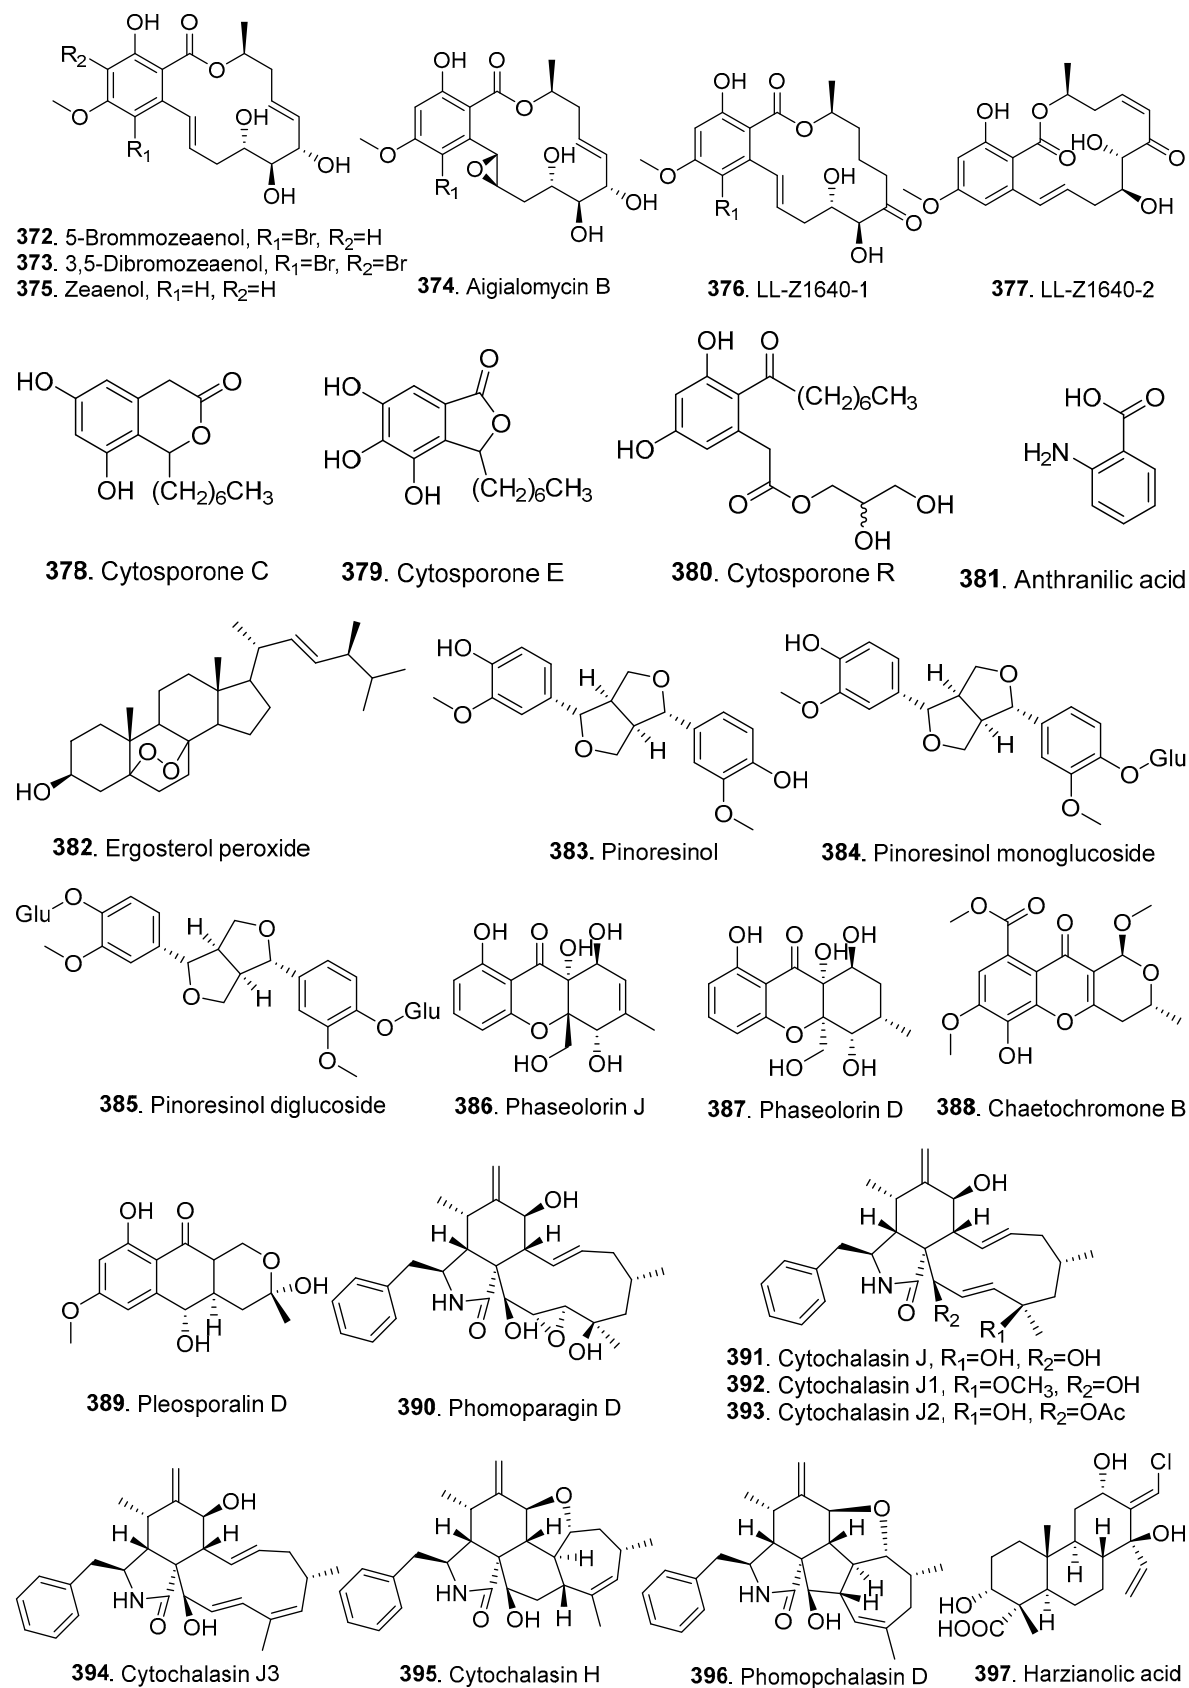

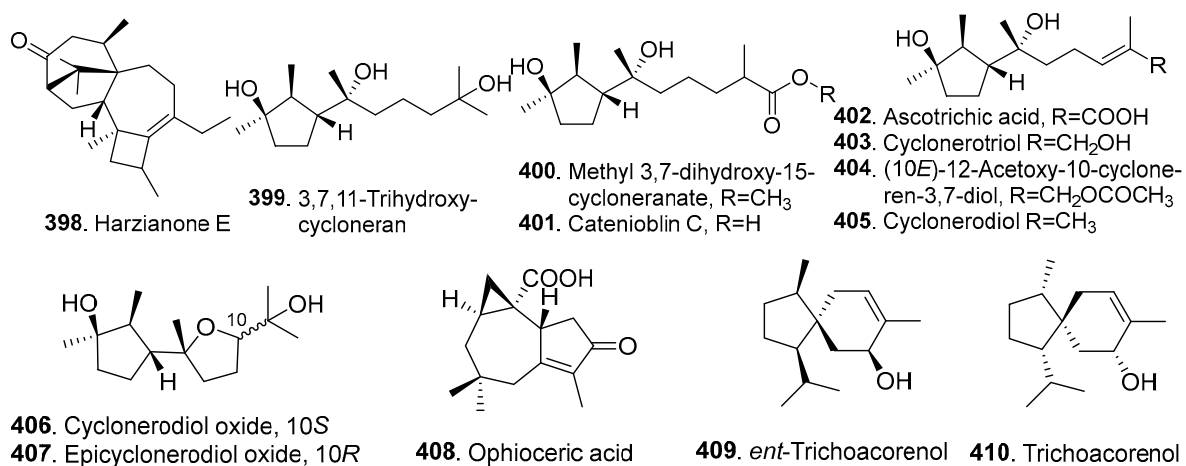

**Figure S7.** Structures of the compounds **372–410** isolated from fungi treated with sodium butyrate (NaBut).

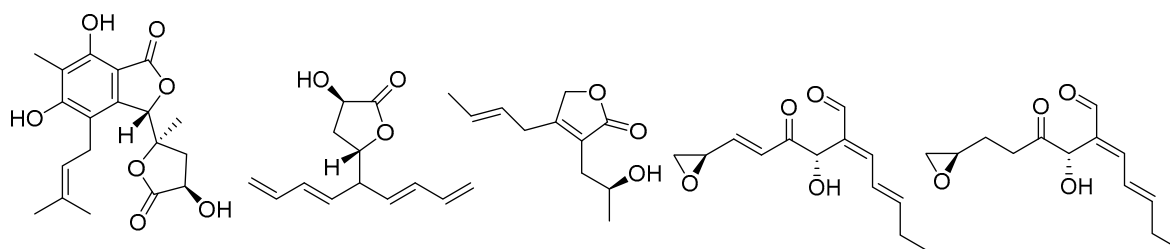

411. Chaetophenol G    412. Cancrolide A    413. Cancrolide B    414. Mollipilin A    415. Mollipilin B

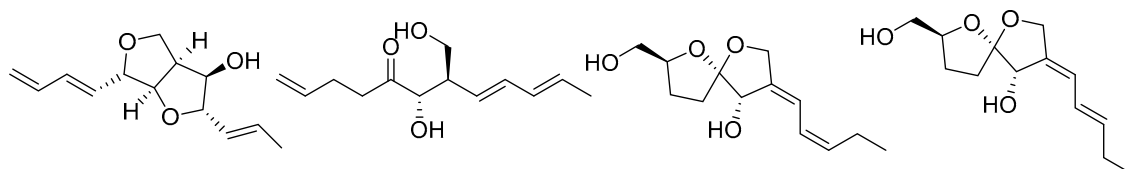

416. Mollipilin C    417. Mollipilin D    418. Mollipilin E    419. Mollipilin F

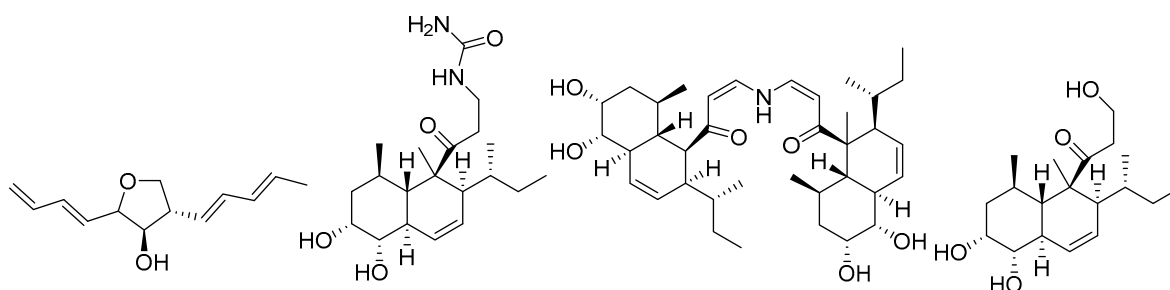

420. Aureonitol    421. Eupenicinicol C    422. Eupenicinicol D    423. Eujavanicol A

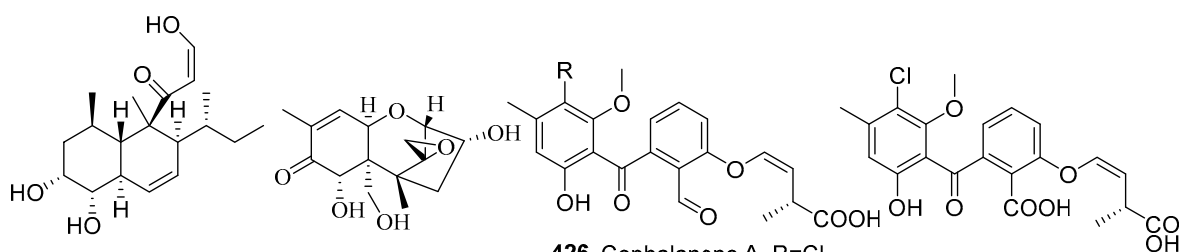

424. Eupenicinicol A    425. Deoxynivalenol    426. Cephalanone A, R=Cl    428. Cephalanone C, R=H    427. Cephalanone B

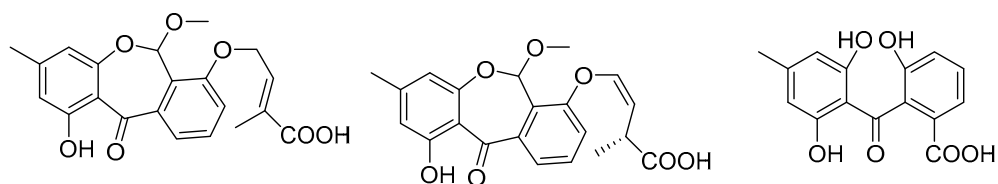

429. Cephalanone D    430. Cephalanone E    431. Cephalanone F

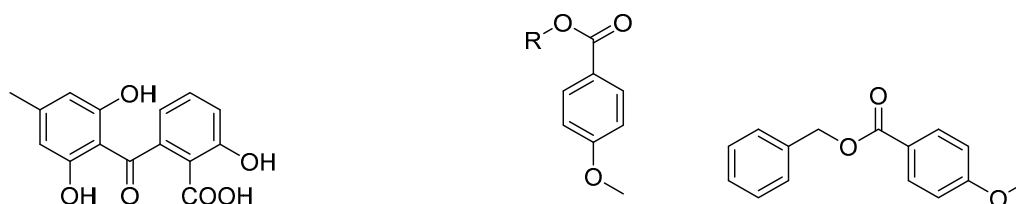

432. 2-(2,6-Dihydroxy-4-methylbenzoyl)-6-hydroxybenzoic acid    433. *p*-Anisic acid, R=H    434. *p*-Anisic acid methyl ester, R=CH<sub>3</sub>

435. Benzyl anisate

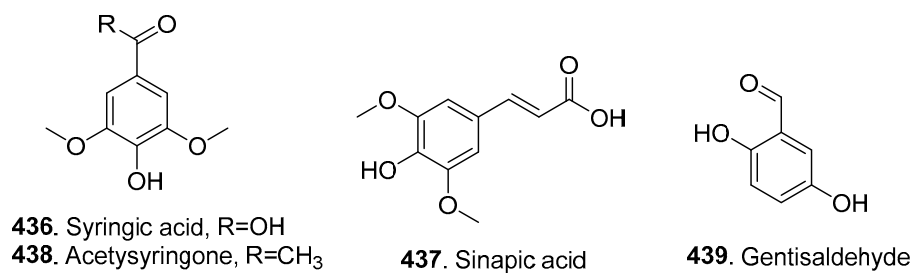

**Figure S8.** Structures of the compounds **411–439** isolated from fungi treated with nicotinamide.

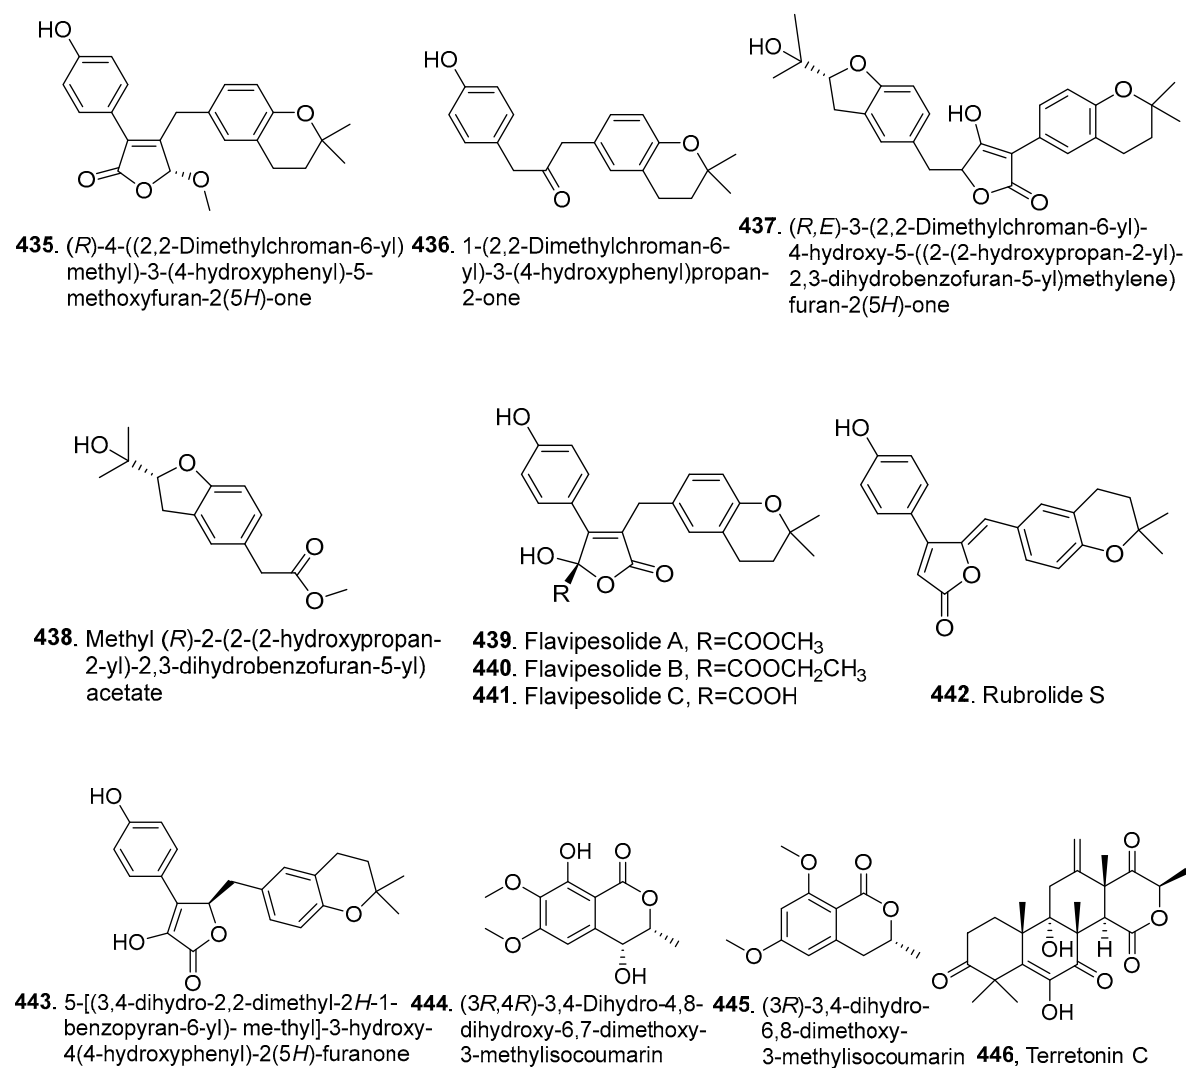

**Figure S9.** Structures of the compounds **440–451** isolated from fungi treated with trichostatin A (TSA).

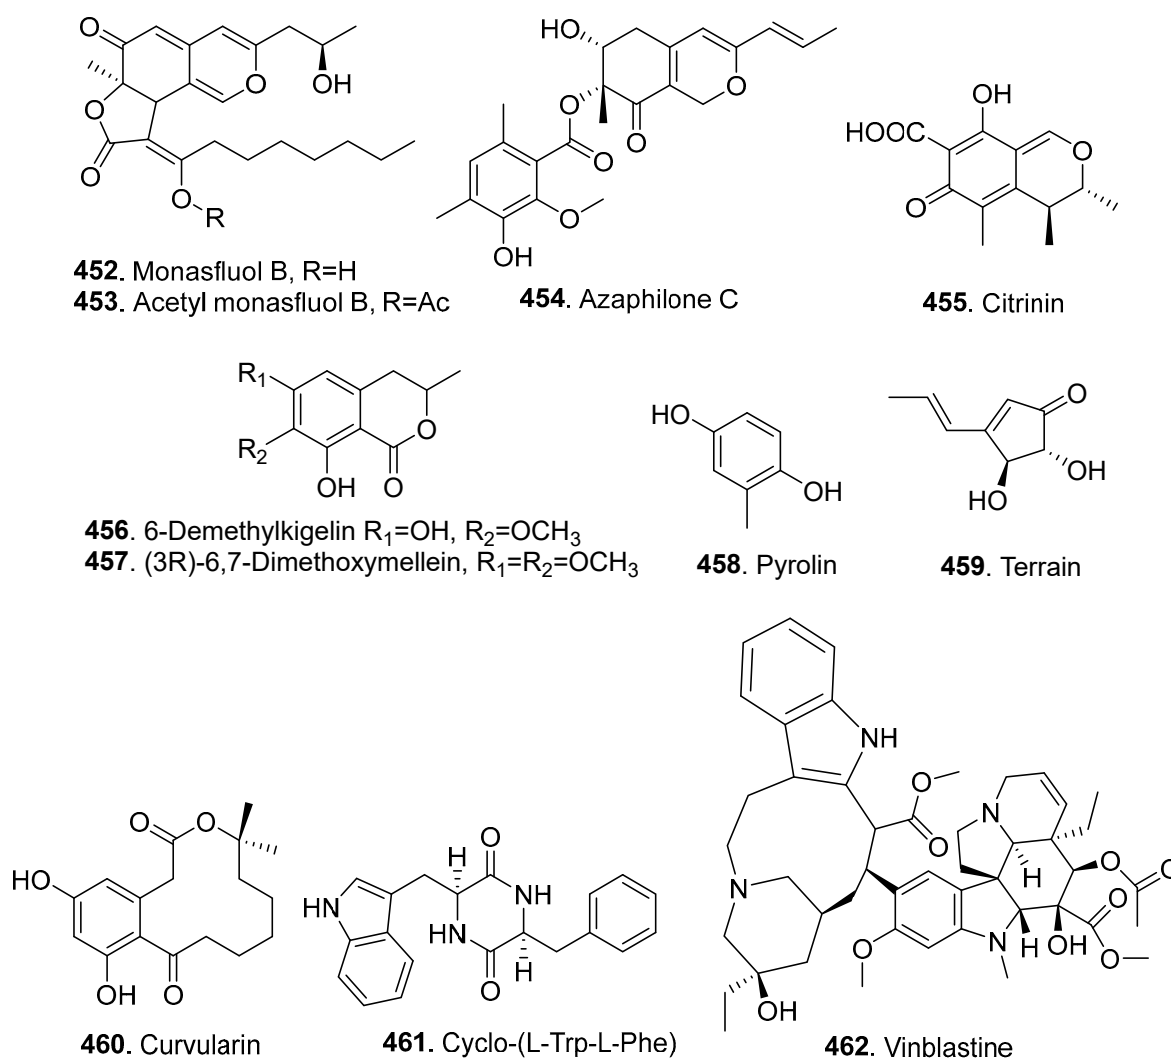

**Figure S10.** Structures of the compounds **452–462** isolated from fungi treated with other histone deacetylase modifiers.

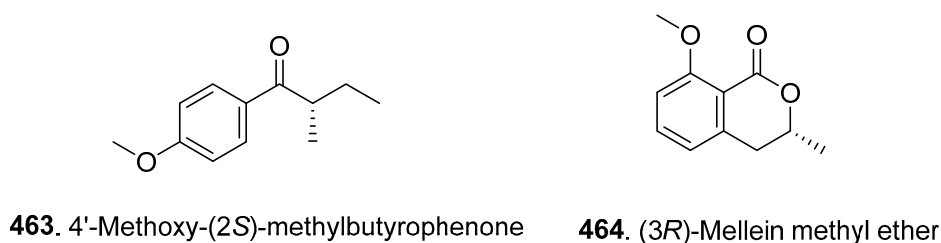

**Figure S11.** Structures of the compounds **463** and **464** isolated from fungi treated with two histone deacetylase modifiers.



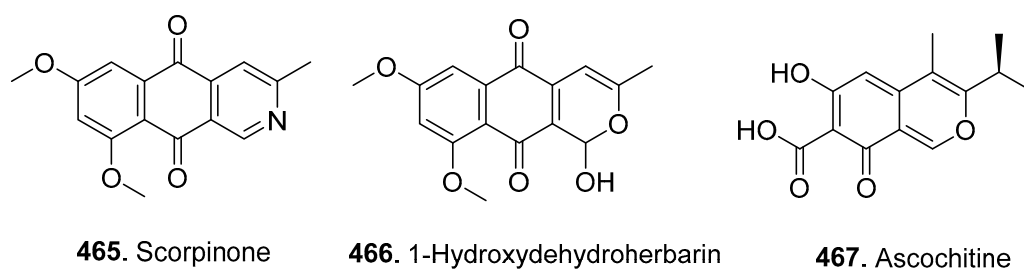

**Figure S12.** Structures of the compounds **465–467** isolated from fungi treated with histone acetyltransferase modifier anacardic acid.

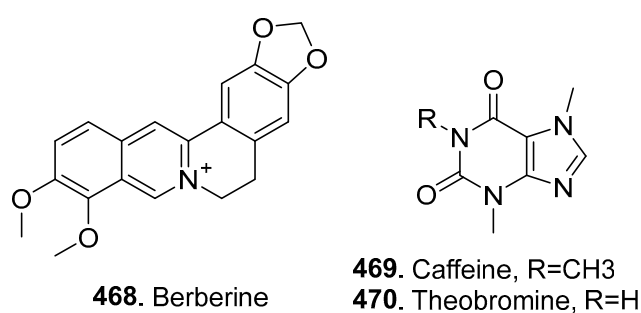

**Figure S13.** Structures of the compounds **468–470** isolated from fungi treated with histone methyltransferase modifier BRD4770.

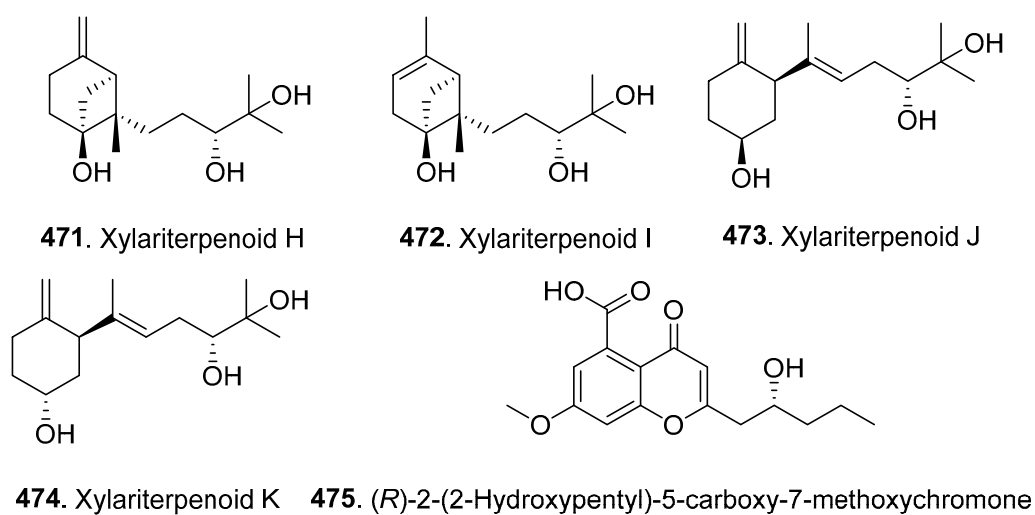

**Figure S14.** Structures of the compounds **471–475** isolated from fungi treated with proteasome modifier bortezomib.

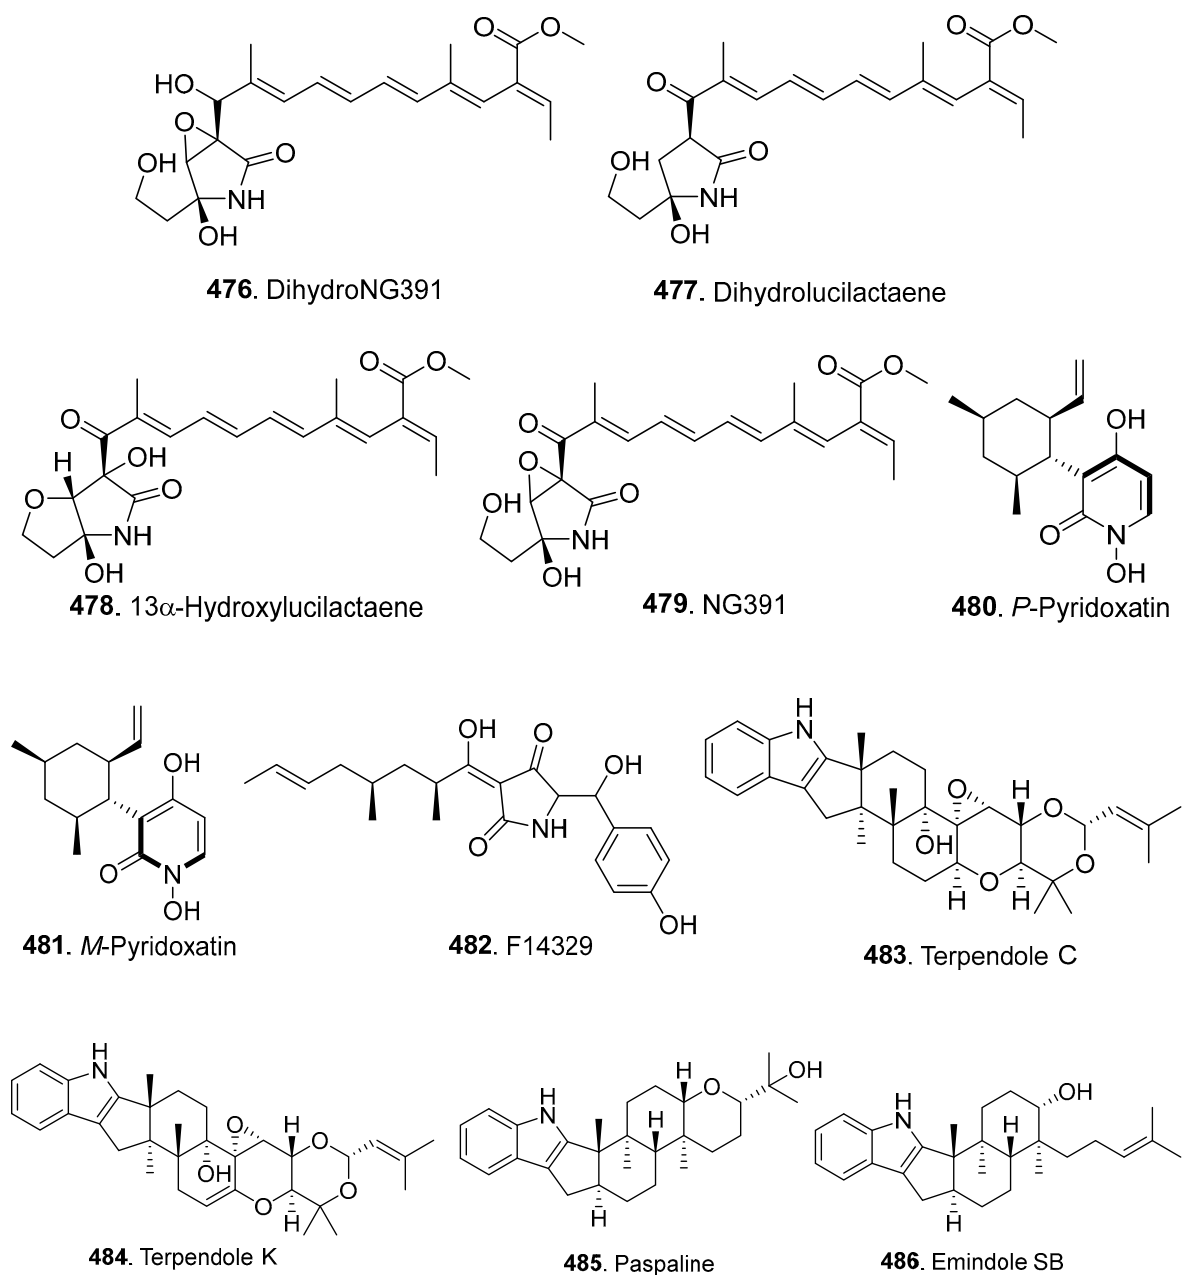

**Figure S15.** Structures of the compounds 476–486 isolated from fungi treated with NPD938.

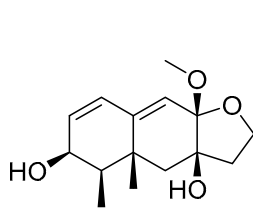**487.** Dihydrobipolaroxin B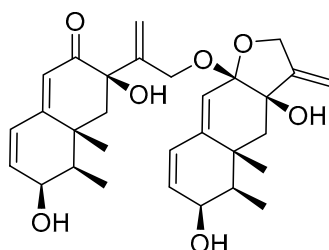**488.** Dihydrobipolaroxin C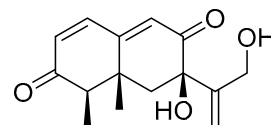**489.** Dihydrobipolaroxin D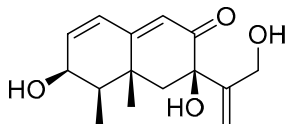**490.** Dihydrobipolaroxin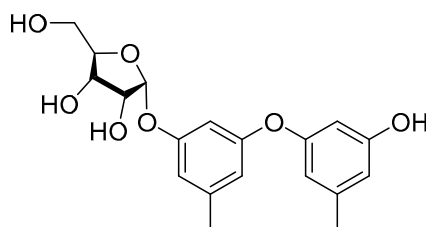**491.** Diorcinol-3-O-α-D-ribofuranoside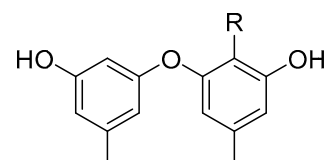**492.** Diorcinol, R=H**494.** Cordyol, R=OH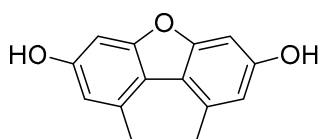**493.** 3,3'-Dihydroxy-5,5'-dimethyldibenzofuran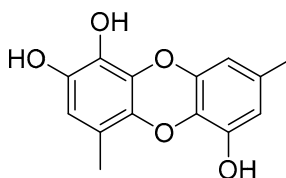**495.** Gibellulin B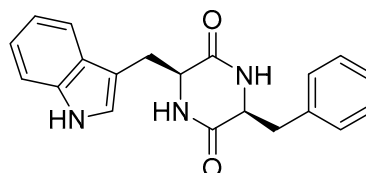**496.** Cyclo-(L-Trp-L-Phe)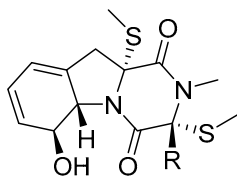**497.** 3-Dehydroxymethylbisdethio-3,10a-bis(methylthio) gliotoxin, R=H**498.** Bisdethiobis(methylthio) gliotoxin, R=CH<sub>2</sub>OH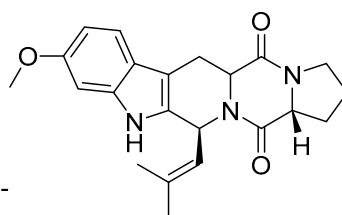**499.** Fumitremorgin C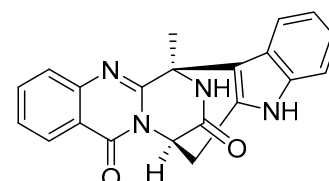**500.** Fumiquinazoline J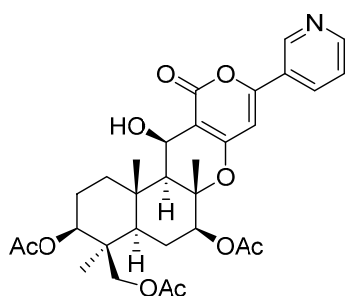**501.** Pyripyropene A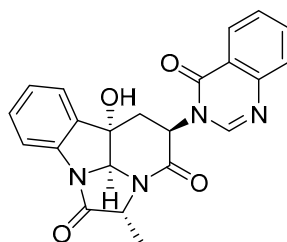**502.** Chaetominine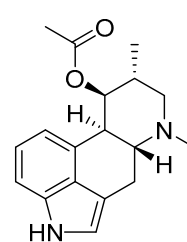**503.** Fumigaclavine A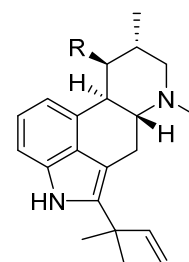**504.** 9-Deacetoxyfumigaclavine C, R=H**505.** Fumigaclavine C, R=OCOCH<sub>3</sub>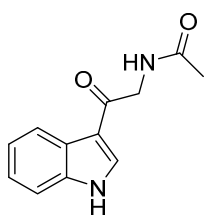**506.** 3-Hydroxyacetyl indole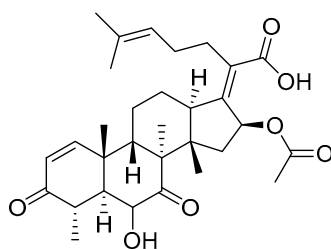**507.** Helvolinic acid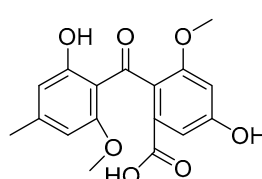**508.** Rhizoctonic acid,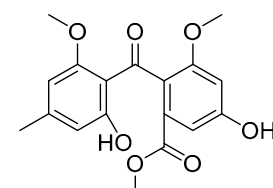**509.** Monomethylsulochrin

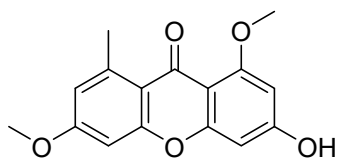

**510.** 3-Hydroxy-1,6-dimethoxy-8-methyl 9H-xanthen-9-one

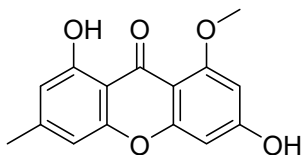

**511.** Questin

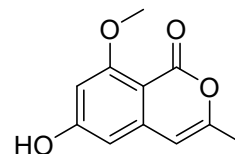

**512.** 6-Hydroxy-8-methoxy-3-methylisocoumarin

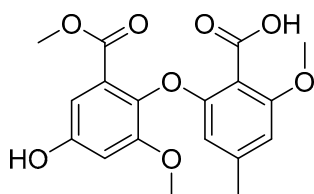

**513.** Circinoporic acid

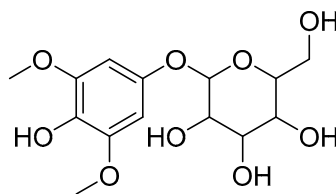

**514.** Koaburaside

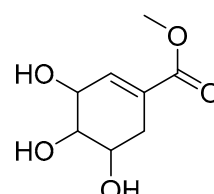

**515.** Methyl shikimate

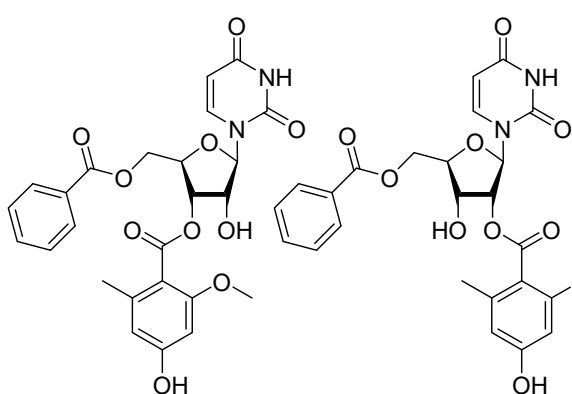

**516.** Kipukasin K

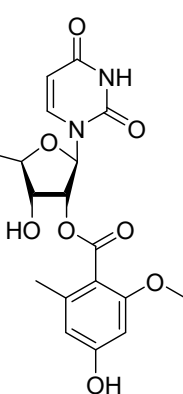

**517.** Kipukasin L

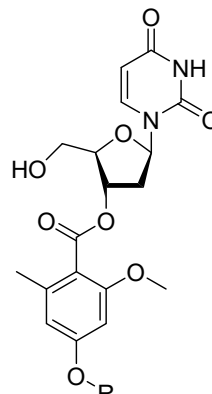

**519.** Kipukasin I, R=H

**521.** Kipukasin D, R=CH<sub>3</sub>

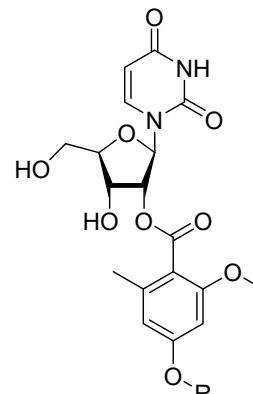

**520.** Kipukasin H, R=H

**522.** Kipukasin E, R=CH<sub>3</sub>

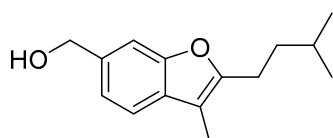

**518.** Aspergillusene E

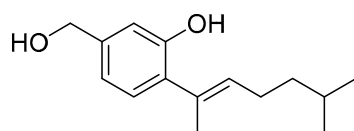

**523.** (E)-5-(Hydroxymethyl)-2-(6'-methylhept-2'-en-2'-yl) phenol

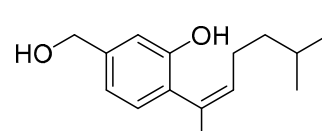

**524.** (Z)-5-(Hydroxymethyl)-2-(6'-methylhept-2'-en-2'-yl) phenol

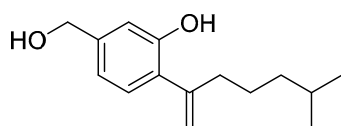

**525.** 7-Deoxy-7,14-didehydroxydonol

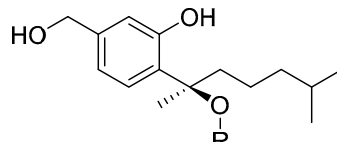

**526.** (7R)-Sydonol, R=H

**527.** (7R)-Methoxysydonol, R=CH<sub>3</sub>

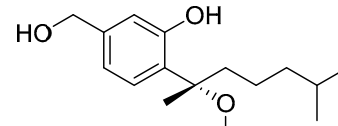

**528.** (7S)-Methoxysydonol

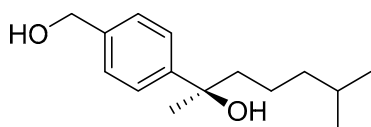

**529.** Aspergiterpenoid A

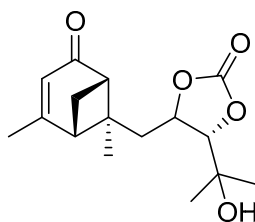

**530.** Eutypeterpene A

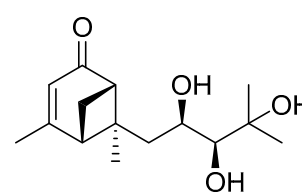

**531.** Eutypeterpene B

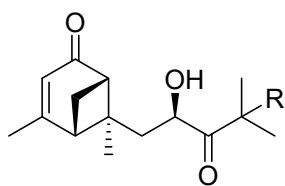**532.** Eutypeterpene C, R=OH**533.** Eutypeterpene D, R=H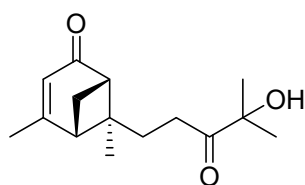**534.** Eutypeterpene E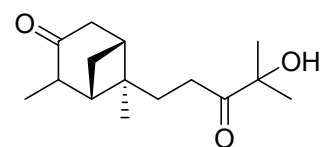**535.** Eutypeterpene E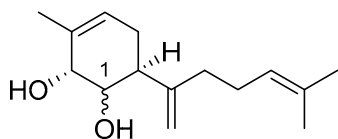**536.** Eutypeterpene G, 1S**537.** Eutypeterpene H, 1R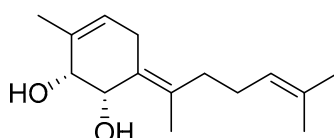**538.** Eutypeterpene I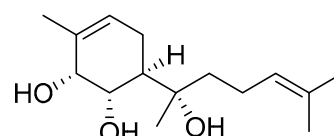**539.** Eutypeterpene J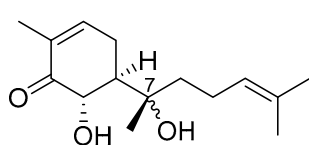**540.** Eutypeterpene K, 7S**541.** Eutypeterpene L, 7R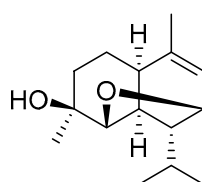**542.** Eutypeterpene M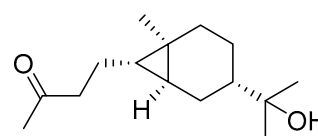**543.** Eutypeterpene N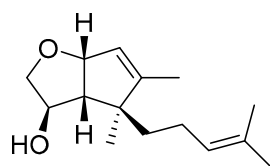**544.** Eutypeterpene O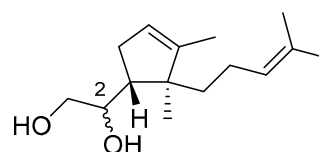**545.** Eutypeterpene P, 2S**546.** Eutypeterpene Q, 2R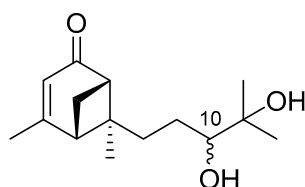**547.** Xylariterpene A, 10S**548.** Xylariterpene B, 10R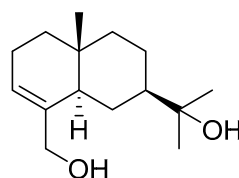**549.** Eudesma-3-en-11,15-diol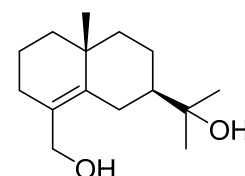**550.** Eudesma-4-en-11,15-diol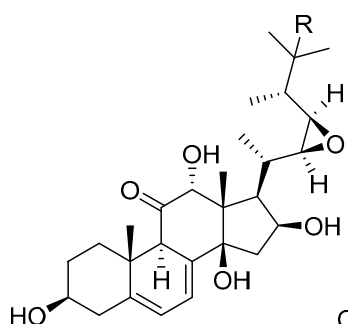**551.** Formosterol A, R=OH**558.** Formosterol C, R=H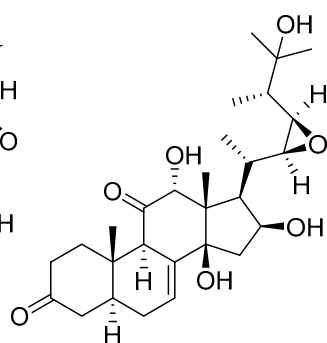**552.** Formosterol B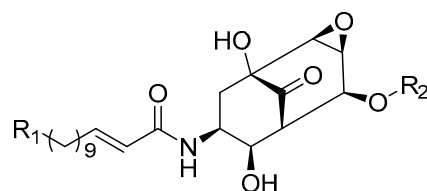**553.** 12'-O-Acetylisariotin A, R<sub>1</sub>=OAc, R<sub>2</sub>=H**561.** TK-57-164A, R<sub>1</sub>=H, R<sub>2</sub>=CH<sub>3</sub>

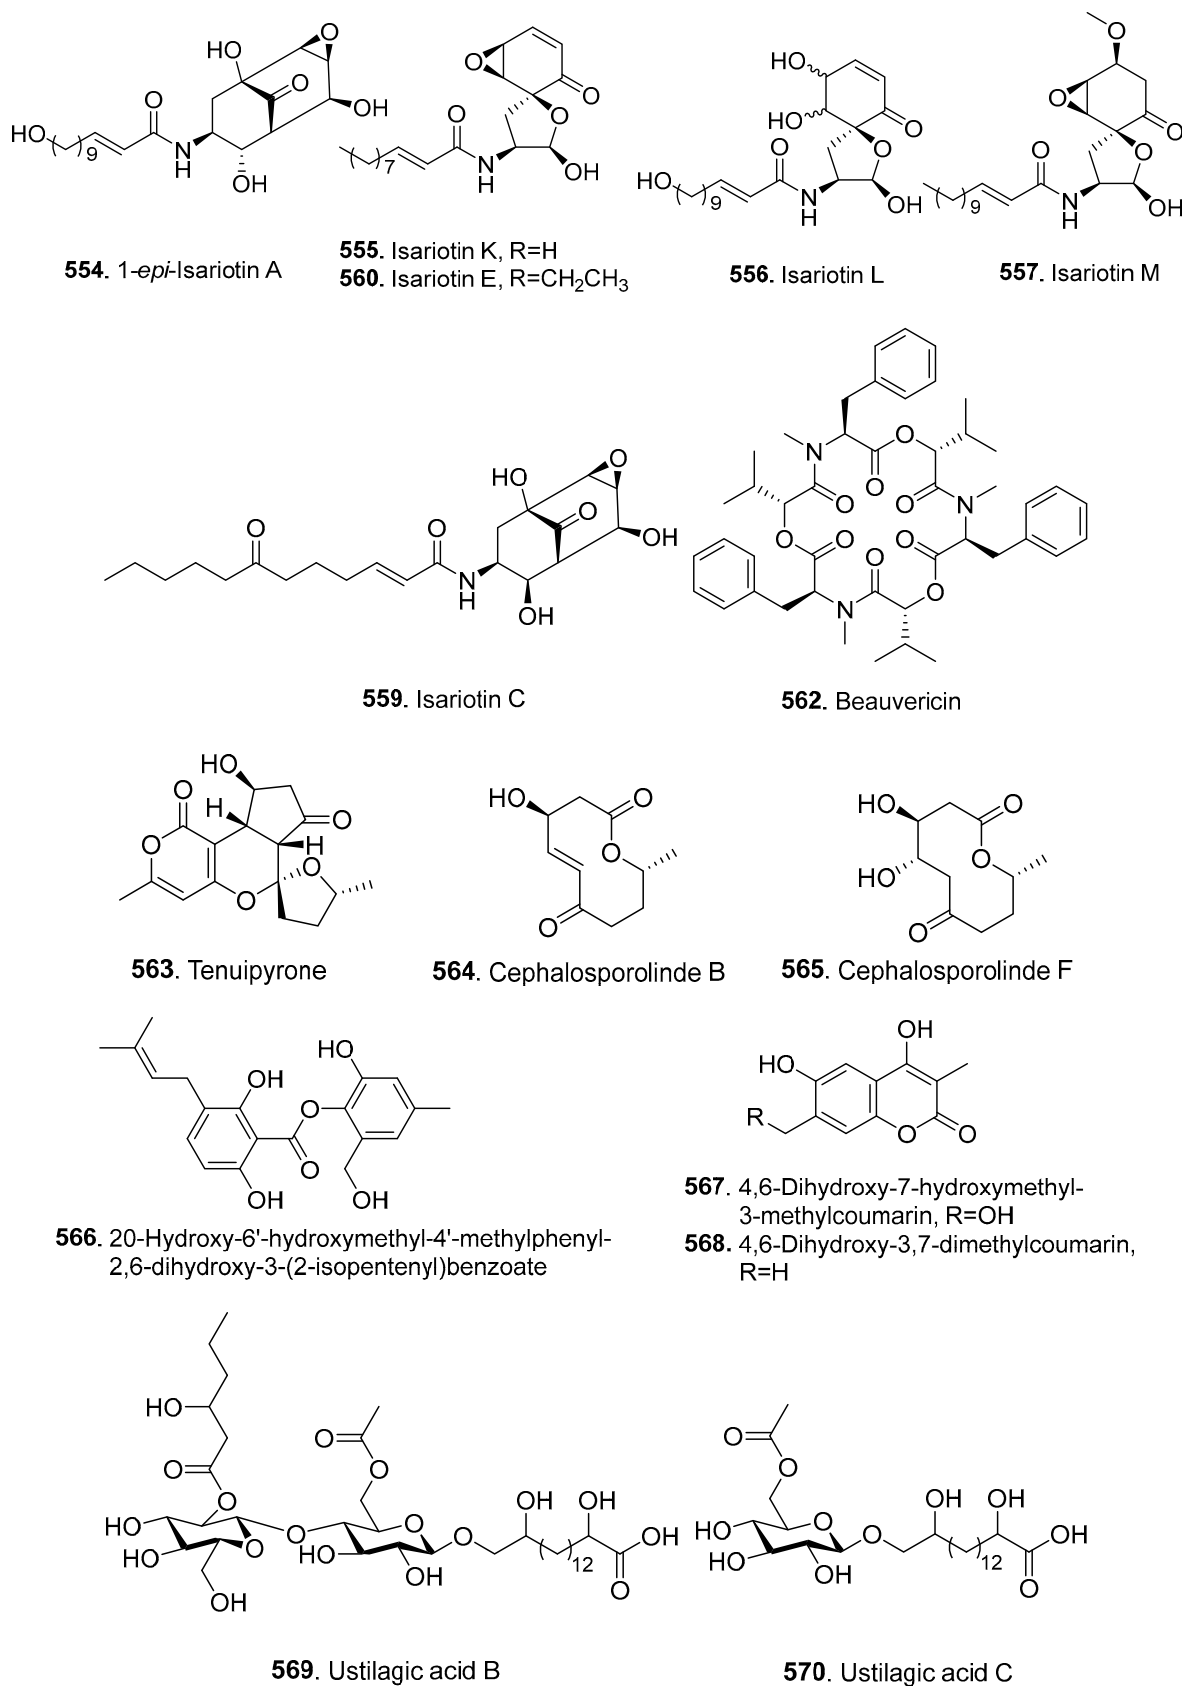

**Figure S16.** Structures of the compounds 487–570 isolated from fungi treated with two types of chemical epigenetic modifiers.

**Table S1.** The examples of 5-Aza affecting production of fungal secondary metabolites.

| Fungal Species                         | Concentration of 5-Aza | Compounds Induced/Enhanced/Decreased                                                                                                                                                                                                                                                                                                                                                                                                                                                                             | Ref.    |
|----------------------------------------|------------------------|------------------------------------------------------------------------------------------------------------------------------------------------------------------------------------------------------------------------------------------------------------------------------------------------------------------------------------------------------------------------------------------------------------------------------------------------------------------------------------------------------------------|---------|
| <i>Alternaria</i> sp.                  | 250 µM                 | Induced production of alternariol (26), alternariol-5- <i>O</i> -methyl ether (27), 3'-hydroxyalternariol-5- <i>O</i> -methyl ether (28), altenusin (29), tenuazonic acid (30), and altertoxin II (31).                                                                                                                                                                                                                                                                                                          | [51]    |
| <i>Aspergillus</i> sp.<br>XS-20090066  | 2 µM                   | Induced production of (7 <i>R</i> )-hydroxysydonic acid (32), (7 <i>S</i> )-sydonic acid (33), (5 <i>S</i> )-5-(hydroxymethyl)-2-(2',6',6'-trimethyltetrahydro-2 <i>H</i> -pyran-2-yl)phenol (34), (7 <i>S</i> ,11 <i>S</i> )-12-hydroxysydonic acid (35), (7 <i>S</i> )-11-dehydroxydonic acid (36), and (5 <i>S</i> )-sydowic acid (37).                                                                                                                                                                       | [52]    |
| <i>Aspergillus clavatus</i>            | 2 µM                   | Enhanced production of cytochalasin E (38), patulin (39) and pseurotin A (40).                                                                                                                                                                                                                                                                                                                                                                                                                                   | [25]    |
| <i>A. flavus</i>                       | 1 mM                   | Inhibited production of aflatoxin B1 (41).                                                                                                                                                                                                                                                                                                                                                                                                                                                                       | [53–55] |
| <i>A. parasiticus</i>                  | 1 mM                   | Inhibited production of aflatoxin B1 (41).                                                                                                                                                                                                                                                                                                                                                                                                                                                                       | [56]    |
| <i>A. niger</i>                        | 1 µM                   | Enhanced production of (Z)-9-octadecenoic acid (42) and 12-methyl-tetradecanoic acid methyl ester (43).                                                                                                                                                                                                                                                                                                                                                                                                          | [15]    |
| <i>A. sydowii</i>                      | 100 µM                 | Induced production of three new bisabolane-type sesquiterpenoids namely (7 <i>S</i> )-sydonic acid (33), (7 <i>S</i> )-7- <i>O</i> -methylsydonol (44), (7 <i>S</i> ,11 <i>S</i> )-12-hydroxysydonic acid (45) and 7-deoxy-7,14-didehydroxydonol (46), along with eight known compounds including (5 <i>S</i> )-sydonol (47), anhydrowaraterpol B (48), (E)-5-(hydroxymethyl)-2-(6'-methylhept-2'-en-2'-yl)phenol (49), AGI-B4 (50), sydowinin A (51), sydowinin B (52), and diorcinol (53).                     | [57]    |
| <i>A. terreus</i> GZU-31-1             | 50 µM                  | Induced production of five butanolide derivatives namely asperbutyrolactones A (54) and B (55), aspulvinone E (56), butyrolactone I (57), and butyrolactone VI (58), and four diphenyl ether derivatives namely, asterolic acid (59), penicillithier (60), methyl asterolic acid (61) and 4',6'-dichloroasterric acid (62).                                                                                                                                                                                      | [58]    |
| <i>Botryosphaeria rhodina</i>          | 10 mg/L                | Enhanced production of camptothecin (63).                                                                                                                                                                                                                                                                                                                                                                                                                                                                        | [59]    |
| <i>Chaetomium</i> sp.                  | 6 mM                   | Enhanced production of isosulochrin (64).                                                                                                                                                                                                                                                                                                                                                                                                                                                                        | [60]    |
| <i>Chaetomium globosporum</i>          | 120 mg/L               | Induced production of two cyclopentenones globosporins A (65) and B (66) and two monoterpenoid indole alkaloids globosporines C (67) and D (68), as well as three known compounds pseurotin A (40), mappianine E (69), and 19(20) <i>Z</i> -5-carboxymethylvallesiachotamine (70).                                                                                                                                                                                                                               | [61]    |
| <i>Cladosporium cladosporioides</i>    | 0.1 µM–10 mM           | Induced production of oxylipins: (9 <i>Z</i> ,12 <i>Z</i> )-11-hydroxyoctadeca-9,12-dienoic acid (71), its methyl ester (72), and glycerol conjugate (73)                                                                                                                                                                                                                                                                                                                                                        | [26]    |
| <i>Cochliobolus lunatus</i><br>TA26–46 | 10 µM                  | Induced production of new diethylene glycol phthalate esters, cochphthesters A–G (74–80), along with four known analogues: 1,2-benzenedicarboxylic acid,1,2-bis [2-(2-hydroxyethoxy) ethyl] ester (81), 1,2-benzenedicarboxylic acid, 1,1-(oxydi-2,1-ethanediyl) 2,2-bis [2-(2-hydroxyethoxy) ethyl] ester (82), 1,2-benzenedicarboxylic acid, 1,2-bis[2-[[2-[[2-(2-hydroxyethoxy) ethoxy] carbonyl] oxy] ethoxy] ethyl] ester (83), and 1,2-benzenedicarboxylic acid, oxydi-2,1-ethanediyl dimethyl ester (84). | [62]    |

|                                                      |           |                                                                                                                                                                                                                                                                                                                                                          |      |
|------------------------------------------------------|-----------|----------------------------------------------------------------------------------------------------------------------------------------------------------------------------------------------------------------------------------------------------------------------------------------------------------------------------------------------------------|------|
| <i>Cochliobolus lunatus</i><br>TA26-46               | 10 µM     | Induced production of two α-pyrone namely<br>cochliobopyrones A (85) and B (86), three isocoumarins namely<br>3-methyl-6,8-dihydroxyisocoumarin (87),<br>6-hydroxy-8-methoxy-3-methylisocoumarin (88),<br>(S)-orthosporin (89), and one chromone altechromone A (90).                                                                                    | [63] |
| <i>Cophinforma mamane</i>                            | 1 µM      | Induced production of three thiodiketopiperazines:<br>botryosulfuranols A (91), B (92) and C (93).                                                                                                                                                                                                                                                       | [64] |
| <i>Cordyceps indigotica</i>                          | 100 µM    | Induced production of aromatic polyketide glycosides:<br>indigotides A (94) and B (95).                                                                                                                                                                                                                                                                  | [65] |
| <i>Diaporthe perseae</i>                             | 1 µM      | Increased production of colchicine (96).                                                                                                                                                                                                                                                                                                                 | [66] |
| <i>Diatrype</i> sp.                                  | 0.1–10 µM | Induced production of new glycosylated polyketides namely<br>lunalides A (97) and B (98).                                                                                                                                                                                                                                                                | [26] |
| <i>Dimorphosporicola</i><br><i>tragani</i> CF-090383 | 100 µM    | Induced production of dendrodolides E (99), G (100), and I<br>(101).                                                                                                                                                                                                                                                                                     | [67] |
| <i>Lophiotrema</i> sp. F6932                         | 50 µM     | Induced production of spirobisanaphthalenes: palmarumycins<br>CP30 (102) and C8 (103).                                                                                                                                                                                                                                                                   | [68] |
| <i>Muscodora yucatanensis</i><br>Ni30                | 50 µM     | Enhanced production of ergosterol (104) and xylaguanol C<br>(105).                                                                                                                                                                                                                                                                                       | [69] |
| <i>Neosartorya udagawae</i><br>HDN13-313             | 73 mg/L   | Induced production of<br>3-methoxy-6-methyl-5-(methylsulfonyl)benzene-1,2,4-triol (106)<br>and neosartoryone A (107).                                                                                                                                                                                                                                    | [70] |
| <i>Penicillium citreonigrum</i>                      | 50 µM     | Enhanced production of sclerotiorin (108), ochrephilone (109),<br>dechloroisochromophilone III (110), dechloroisochromophilone<br>IV (111), 6-((3E,5E)-5,7-dimethyl-2-methylenenona-3,5-dienyl)-<br>2,4-dihydroxy-3-methylbenzaldehyde (112), sclerotioramine<br>(113), pencolide (114), atlantinones A (115) and B (116).                               | [35] |
| <i>Penicillium minioluteum</i>                       | 500 µM    | Induced production of new aspertetronin dimers: miniolins<br>A–C (117–119), along with their precursor aspertetronin A<br>(120).                                                                                                                                                                                                                         | [71] |
| <i>Penicillium variabile</i><br>HXQ-H-1A             | 0.2 mM    | Induced production of a highly modified fatty acid amide,<br>varitatin A (121).                                                                                                                                                                                                                                                                          | [72] |
| <i>Pestalotiopsis</i><br><i>crassiuscula</i>         | 500 mM    | Induced production of 4,6-dihydroxy-3,7-dimethylcoumarin<br>(122), pestalotiopyrone G (123) and<br>2'-hydroxy-6'-hydroxy-methyl-4'-methylphenyl<br>2,6-dihydroxy-3-(2-isopentenyl)benzoate (124).                                                                                                                                                        | [73] |
| <i>Pestalotiopsis microspora</i>                     | 500 µM    | Induced production of<br>4'-formamidophenyl-5-methoxybenzoate (125),<br>pestalotiopyrone G (123), 4-hydroxybenzoic acid (126),<br>LL-P880α (127), 2'-hydroxy<br>6'-hydroxymethyl-4'-methylphenyl-2,6-dihydroxy-3-(2-isopente<br>nyl)benzoate (128), pestalotiollide B (129), endocrocin (130) and<br>1'-hydroxy-4-methoxy-6-pentyl-2H-pyran-2-one (131). | [74] |
| <i>Phomopsis</i> sp. MD 86                           | 10 mg/L   | Enhanced production of camptothecin (63).                                                                                                                                                                                                                                                                                                                | [59] |
| <i>Xylaria psidii</i>                                | 10 µM     | Enhanced production of resveratrol (132).                                                                                                                                                                                                                                                                                                                | [75] |



**Table S2.** The examples of SAHA affecting production of fungal secondary metabolites.

| Fungal Species                          | Concentration of SAHA | Compounds Induced/Enhanced/Decreased                                                                                                                                                                                                                                                                                                                                                                                                                                                                                                                            | Ref. |
|-----------------------------------------|-----------------------|-----------------------------------------------------------------------------------------------------------------------------------------------------------------------------------------------------------------------------------------------------------------------------------------------------------------------------------------------------------------------------------------------------------------------------------------------------------------------------------------------------------------------------------------------------------------|------|
| <i>Aspergillus</i> sp. AST0006          | 250 $\mu$ M           | Induced production of two new 3-(4-oxopyrano)-chromen-2-ones namely aspyranochromenones A ( <b>150</b> ) and B ( <b>151</b> ), along with nine known metabolites namely 6,7-dihydroxymellein ( <b>152</b> ), terrein ( <b>153</b> ), (3 <i>R</i> )-6-hydroxymellein ( <b>154</b> ), ( <i>R</i> )-orthosporin ( <b>155</b> ), 6,7-dimethoxymellein ( <b>156</b> ), 6-methoxymellein ( <b>157</b> ), (2 <i>E</i> ,6 <i>E</i> ,10 <i>E</i> )-12-hydroxyfarnesol ( <b>158</b> ), 5,6-dihydroxymellein ( <b>159</b> ), and ethyl 3-methylorsellinate ( <b>160</b> ). | [81] |
| <i>A. calidoustus</i>                   | 100 $\mu$ M           | Increased production of phenylahistin ( <b>161</b> ).                                                                                                                                                                                                                                                                                                                                                                                                                                                                                                           | [82] |
| <i>A. nidulans</i>                      | 100 $\mu$ M           | Induced production of fellutamides fellutamide B ( <b>163</b> ), antibiotic 1656G ( <b>164</b> ) and antibiotic 3127 ( <b>165</b> ).                                                                                                                                                                                                                                                                                                                                                                                                                            | [83] |
| <i>A. nidulans</i>                      | 100 $\mu$ M           | Induced production of aspercryptins A1 ( <b>166</b> ) and A2 ( <b>167</b> ).                                                                                                                                                                                                                                                                                                                                                                                                                                                                                    | [84] |
| <i>A. niger</i> ATCC1015                | 10 $\mu$ M            | Induced production of nygerone A ( <b>168</b> ).                                                                                                                                                                                                                                                                                                                                                                                                                                                                                                                | [41] |
| <i>A. terreus</i> PF26                  | 500 $\mu$ M           | Enhanced production of terrein ( <b>153</b> ) and (3 <i>R</i> )-6-hydroxymellein ( <b>154</b> ).                                                                                                                                                                                                                                                                                                                                                                                                                                                                | [85] |
| <i>A. terreus</i> RA2905                | 100 $\mu$ M           | Induced production of (+)- and (-)-asperfuranones ( <b>169</b> and <b>170</b> ) together with two benzyl pyrones, asperpyranones A ( <b>171</b> ) and B ( <b>172</b> ).                                                                                                                                                                                                                                                                                                                                                                                         | [86] |
| <i>A. versicolor</i> MCCC 3A00080       | 20 mg/L               | Induced production of versiperol A ( <b>173</b> ), diorcinol ( <b>53</b> ) and 2,4-dimethoxyphenol ( <b>174</b> ).                                                                                                                                                                                                                                                                                                                                                                                                                                              | [87] |
| <i>A. versicolor</i> OUCMDZ-2738        | 10 $\mu$ M            | Induced production of diorcinol ( <b>53</b> ), 3-[6-(2-methylpropyl)-2-oxo-1 <i>H</i> pyrazin-3-yl] propanamide ( <b>175</b> ), brevianamide X ( <b>176</b> ), brevianamide R ( <b>177</b> ), brevianamide Q ( <b>178</b> ), diorcinol C ( <b>179</b> ), diorcinol E ( <b>180</b> ), and methyl diorcinol-4-carboxylate ( <b>181</b> ).                                                                                                                                                                                                                         | [88] |
| <i>A. wentii</i> na-3                   | 20 $\mu$ M            | Induced production of aspewentins A ( <b>182</b> ) and B ( <b>183</b> ), along with an oxygenated derivative, aspewentin C ( <b>184</b> ).                                                                                                                                                                                                                                                                                                                                                                                                                      | [89] |
| <i>A. westerdijkiae</i>                 | 100 $\mu$ M           | Increased production of penicillic acid ( <b>162</b> ).                                                                                                                                                                                                                                                                                                                                                                                                                                                                                                         | [82] |
| <i>Asteromyces cruciatus</i>            | 100 $\mu$ M           | Induced production of primarolides A ( <b>185</b> ) and B ( <b>186</b> ).                                                                                                                                                                                                                                                                                                                                                                                                                                                                                       | [91] |
| <i>Beauveria felina</i>                 | 500 $\mu$ M           | Induced production of eight cyclodepsipeptides: desmethylisaridin E ( <b>187</b> ), isaridin E ( <b>188</b> ), desmethylisaridin C2 ( <b>189</b> ), isaridin C2 ( <b>190</b> ), isaridin F ( <b>191</b> ), destruxin A ( <b>192</b> ), reseotoxin B ( <b>193</b> ), and roseocardin ( <b>194</b> ).                                                                                                                                                                                                                                                             | [92] |
| <i>Bjerkandera adusta</i>               | 300 $\mu$ M           | Induced production of six tremulane sesquiterpenoids: 11,12-dihydroxy-1-tremulen-5-one ( <b>195</b> ), (3 <i>S</i> ,6 <i>R</i> ,7 <i>R</i> )-tremul-1-ene-6,11,12-triol ( <b>196</b> ), ceriponol A ( <b>197</b> ), conocanol B ( <b>198</b> ), and conocanolides A ( <b>199</b> ) and B ( <b>200</b> )                                                                                                                                                                                                                                                         | [93] |
| <i>Botrytis cinerea</i> B05.10          | 50–200 $\mu$ M        | Induced production of botrycinereic acid ( <b>201</b> ).                                                                                                                                                                                                                                                                                                                                                                                                                                                                                                        | [10] |
| <i>Chaetomium</i> sp.                   | 6 mM                  | Enhanced production of isosulochrin ( <b>64</b> ).                                                                                                                                                                                                                                                                                                                                                                                                                                                                                                              | [60] |
| <i>Chalara</i> sp. 6661                 | 1 mM                  | Induced production of chalanilines A ( <b>202</b> ) and B ( <b>203</b> ), and adenosine-coupled xanthenes A ( <b>204</b> ) and B ( <b>205</b> ).                                                                                                                                                                                                                                                                                                                                                                                                                | [94] |
| <i>Cladosporium cladosporioides</i>     | 10 mM                 | Induced production of cladochromes F ( <b>206</b> ) and G ( <b>207</b> ), cladochromes A ( <b>208</b> ), B ( <b>209</b> ), D ( <b>210</b> ), and E ( <b>211</b> ) and calphostin B ( <b>212</b> ).                                                                                                                                                                                                                                                                                                                                                              | [26] |
| <i>Cladosporium sphaerospermum</i> L3P3 | 300 $\mu$ M           | Induced production of cladossins H–K ( <b>213–216</b> ) and cladodionen ( <b>217</b> ).                                                                                                                                                                                                                                                                                                                                                                                                                                                                         | [95] |

|                                           |         |                                                                                                                                                                                                                                                                                                                                                                                                                                    |       |
|-------------------------------------------|---------|------------------------------------------------------------------------------------------------------------------------------------------------------------------------------------------------------------------------------------------------------------------------------------------------------------------------------------------------------------------------------------------------------------------------------------|-------|
| <i>Claviceps purpurea</i> Cp-1            | 500 µM  | Enhanced production of ergometrine (218).                                                                                                                                                                                                                                                                                                                                                                                          | [96]  |
| <i>Cyathus stercoreus</i>                 | 200 µM  | Induced production of nine novel sesquiterpenoids: cysteracorolide (219), cysteracorodiol A (220), 4-O-acetylcybrodol (221), 14-dehydroxycybrodol (222), cysteracorodiol B (223), 4-O-acetylcysteracorodiol B (224), 1-O-methoxycysteracorodiol B (225), cysteracorodiol C (226), and cysteracorotone (227) along with four known sesquiterpenes, epicoterpene D (228), russujaponol F (229), riparol B (230), and cybrodol (231). | [97]  |
| <i>Daldinia</i> sp.                       | 800 µM  | Induced production of daldinone E (232).                                                                                                                                                                                                                                                                                                                                                                                           | [98]  |
| <i>Drechslera</i> sp.                     | 500 µM  | Induced production of hexosylphytosphyngosine (233).                                                                                                                                                                                                                                                                                                                                                                               | [40]  |
| <i>Lachnum palmae</i>                     | 500 µM  | Induced production of eighteen dihydroisocoumarins: palmaerones A–G (234–240), mellein (18), (3R)-6-hydroxymellein (154), (R)-6-methoxymellein (157) (R)-5-cholro-6-hydroxymellein (241), (3R,4R)-5-cholro-4,6-dihydroxymellein (242), palmaerin A (243), palmaerin B (244), palmaerin D (245), <i>trans</i> -4-hydroxymellein (246), <i>cis</i> -4-hydroxymellein (247), and (R)-5-hydroxymellein (248).                          | [99]  |
| <i>Microascus</i> sp.                     | 100 µM  | Induced production of a cyclic pentadepsipeptide namely EGM-556 (249).                                                                                                                                                                                                                                                                                                                                                             | [42]  |
| <i>Muscodor yucatanensis</i><br>Ni30      | 50 µM   | Induced production of ergosterol (104) and xylaguaianol C (105).                                                                                                                                                                                                                                                                                                                                                                   | [69]  |
| <i>Penicillium</i> sp. HS-11              | 80 mg/L | Induced production of 4-epipenicillone B (250) and (R)-chrysogine (251).                                                                                                                                                                                                                                                                                                                                                           | [100] |
| <i>Penicillium</i> sp.<br>KMU18029        | 100 µM  | Induced production of meroditerpenoids: pyrandecarurins A (252) and B (253), pileotins A (254) and B (255), along with their potential precursor decaturenoid (256), as well as the known meroterpenoids 15-hydroxydecaurur A (257), oxalicipines A (258) and B (259), and penisarin B (260).                                                                                                                                      | [101] |
| <i>Penicillium brasilianum</i>            | 200 µM  | Induced production of brasiliamide A (261), verruculogen TR2 (262), and penicillic acid (162).                                                                                                                                                                                                                                                                                                                                     | [27]  |
| <i>Pencillium mallochii</i><br>CCH01      | 1 mM    | Induced production of sclerotiorin (108), sclerotioramine (113), and isochromophilones XIV (263) and XV (264).                                                                                                                                                                                                                                                                                                                     | [102] |
| <i>Penicillium variabile</i><br>HXQ-H-1   | 300 µM  | Induced production of seven polyketides, including four new ones namely varilactones A (265) and B (266) and wortmannilactones M (267) and N (268), as well as three biogenetically related known wortmannilactones E (269), F (270) and H (271).                                                                                                                                                                                  | [103] |
| <i>Phoma</i> sp. LG0217                   | 500 µM  | Induced production of (10'S)-verruculide B (272), vermistatin (273) and dihydrovermistatin (274).                                                                                                                                                                                                                                                                                                                                  | [104] |
| <i>Spiromastix</i> sp.                    | 500 µM  | Induced production of nine new guaine-type sesquiterpenes named spiromaterpenes A (277), B (278), C (279), D (280), E (281), F (282), G (283), H (284), and I (285).                                                                                                                                                                                                                                                               | [105] |
| <i>Talaromyces funiculosus</i><br>HPU-Y01 | 300 µM  | Induced production of funitatin A (286).                                                                                                                                                                                                                                                                                                                                                                                           | [106] |
| <i>Talaromyces wortmannii</i>             | 100 µM  | Induced production of wortmannilactones I–L (287–290).                                                                                                                                                                                                                                                                                                                                                                             | [107] |
| <i>Xylaria psidii</i>                     | 5 µM    | Increased production of resveratrol (132).                                                                                                                                                                                                                                                                                                                                                                                         | [75]  |

**Table S3.** The examples of SBHA affecting production of fungal secondary metabolites.

| Fungal Species                             | Concentration of SBHA | Compounds Induced/Enhanced/Decreased                                                                                                                                                                                        | Ref.  |
|--------------------------------------------|-----------------------|-----------------------------------------------------------------------------------------------------------------------------------------------------------------------------------------------------------------------------|-------|
| <i>Alternaria</i> sp.                      | 250 µM                | Induced production of alternariol (26), alternariol-5- <i>O</i> -methyl ether (27), 3'-hydroxyalternariol-5- <i>O</i> -methyl ether (28), altenusin (29), tenuazonic acid (30), and altertoxin II (31).                     | [51]  |
| <i>Arthrotrrys foliicola</i>               | 500 µM                | Induced production of 4-ethyl-7-hydroxy-8-methyl-2 <i>H</i> -chromen-2-one (291).                                                                                                                                           | [109] |
| <i>Chaetomium indicum</i>                  | 500 µM                | Induced production of chaetophenols A–F (292–297).                                                                                                                                                                          | [110] |
| <i>C. indicum</i>                          | 500 µM                | Induced production of spiroindicumides A (298) and B (299).                                                                                                                                                                 | [111] |
| <i>Cladosporium cladosporioides</i>        | 0.1–10 mM             | Induced production of cladochromes A (208), B (209), D (210), E (211), F (206), and G (207), and calphostin B (212).                                                                                                        | [26]  |
| <i>Cladosporium colocasiae</i>             | 500 µM                | Induced production of (3β,7α)-cholest-5-en-23-yne-3,7-diol (300) and (3β,7α)-cholest-5-en-23-yne-3,7,25-triol (301).                                                                                                        | [112] |
| <i>Cordyceps annullata</i>                 | 500 µM                | Induced production of four 2,3-dihydrobenzofurans, annullatins A–D (302–305), and one aromatic polyketide, annullatin E (306).                                                                                              | [113] |
| <i>Cordyceps indigotica</i>                | 1 mM                  | Induced production of six novel aromatic polyketides namely indigotides C–F (307–310), 13-hydroxyindigotide A (311), and 8- <i>O</i> -methylindigotide B (312) along with indigotides A (94) and B (95)                     | [114] |
| <i>Eutypella</i> sp. MCCC 3A00281          | 1 mM                  | Induced production of 26 eremophilane-type sesquiterpenoids namely eutyperemophilanes A–Z (313–338).                                                                                                                        | [115] |
| <i>Fusarium oxysporum</i> sp. conglutinans | 500 µM                | Induced production of two fusaric acid derivatives namely 5-butyl-6-oxo-1,6-dihydropyridine-2-carboxylic acid (339) and 5-(but-9-enyl)-6-oxo-1,6-dihydropyridine-2-carboxylic acid (340).                                   | [116] |
| <i>Gibellula formosana</i>                 | 1 mM                  | Enhanced production of isariotin A (341).                                                                                                                                                                                   | [38]  |
| <i>Paraconiothyrium brasiliense</i>        | 500 µM                | Induced production of JBIR-54 (342).                                                                                                                                                                                        | [117] |
| <i>Phomopsis</i> sp. 0391                  | 500 µM                | Induced production of new metabolite 13-angeloyloxy-diplosporin (343) and six known 3-methoxymethyl-agistatine D (344), gynuraone (345), mellein (18), cytosporone B (346), dothiorelone A (347), and dothiorelone C (348). | [118] |
| <i>Torrubiella luteorostrata</i>           | 1 µM                  | Induced production of three new prenylated tryptophan analogs, luteorides A–C (349–351).                                                                                                                                    | [119] |

**Table S4.** The examples of VPA or SVP affecting production of fungal secondary metabolites.

| <b>Fungal Species</b>                                | <b>VPA/SVP and its Concentration</b> | <b>Compounds Induced/Enhanced/Decreased</b>                                                                                                                                                                                                            | <b>Ref.</b> |
|------------------------------------------------------|--------------------------------------|--------------------------------------------------------------------------------------------------------------------------------------------------------------------------------------------------------------------------------------------------------|-------------|
| <i>Aspergillus clavatus</i>                          | VPA, 60 µM                           | Enhanced production of cytochalasin E (38).                                                                                                                                                                                                            | [25]        |
| <i>Aspergillus fumigatus</i><br>GA-L7                | VPA, 500 µM                          | Induced production of fumiquinazoline C (352).                                                                                                                                                                                                         | [120]       |
| <i>Cordyceps militaris</i>                           | VPA, 50 µM                           | Induced production of cordycepin (353).                                                                                                                                                                                                                | [121]       |
| <i>Diaporthe</i> sp.                                 | VPA, 100 µM                          | Induced production of three novel cytotoxic secondary metabolites namely xylarolide A (354), diportharine A (355) and xylarolide B (356), along with one known compound xylarolide (357).                                                              | [122]       |
| <i>Diaporthe</i> sp. PF20                            | VPA, 100 µM                          | Enhanced production of piperine (358).                                                                                                                                                                                                                 | [123]       |
| <i>Dimorphosporicola</i><br><i>tragani</i> CF-090383 | VPA, 100 µM                          | Induced production of dendrodolides E (99), G (100) and I (101).                                                                                                                                                                                       | [67]        |
| <i>Doratomyces microspora</i>                        | VPA, 50 µM                           | Enhanced production of <i>p</i> -hydroxy benzaldehyde (359), phenyl acetic acid (360), phenyllactic acid (361), indole-3-carboxylic acid (362), indole-3-acetic acid (363), cyclo-(proline-methionine) (364), and cyclo-(phenylalanine-proline) (365). | [27]        |
| <i>Drechslera</i> sp.                                | VPA, 500 µM                          | Increased production of benzophenone (366).                                                                                                                                                                                                            | [40]        |
| <i>Macrophomina phaseolina</i>                       | SVP, 1 mM                            | Induced production of 3-acetyl-2-methyl dihydro-furan-2(3 <i>H</i> )-one (367) and 2-methyl-3-methylthio-butanoic acid (368).                                                                                                                          | [124]       |
| <i>Penicillium chrysogenum</i><br>HLS111             | SVP, 10 µM                           | Induced production of three new heterodimeric tetrahydroxanthone–chromanone lactones chrysoxanthones A–C (369–371).                                                                                                                                    | [125]       |

**Table S5.** The examples of NaBut affecting production of fungal secondary metabolites.

| Fungal Species                              | Concentration of NaBut | Compounds Induced/Enhanced/Decreased                                                                                                                                                                                                                                                                                                                                                                                                                                                                    | Ref.  |
|---------------------------------------------|------------------------|---------------------------------------------------------------------------------------------------------------------------------------------------------------------------------------------------------------------------------------------------------------------------------------------------------------------------------------------------------------------------------------------------------------------------------------------------------------------------------------------------------|-------|
| <i>Aspergillus clavatus</i>                 | 9 $\mu$ M              | Enhanced production of cytochalasin E (38), patulin (39), and pseurotin A (40).                                                                                                                                                                                                                                                                                                                                                                                                                         | [25]  |
| <i>Cochliobolus lunatus</i><br>TA26-46      | 10 mM                  | Induced production of novel brominated resorcylic acid lactones: 5-bromozeaenol (372) and 3,5-dibromozeaenol (373), together with four known analogues aigialomycin B (374), zeaenol (375), LL-Z1640-1 (376), and LL-Z1640-2 (377).                                                                                                                                                                                                                                                                     | [127] |
| <i>Diaporthe</i> sp. PF20                   | 100 $\mu$ M            | Enhanced production of piperine (358).                                                                                                                                                                                                                                                                                                                                                                                                                                                                  | [123] |
| <i>Leucostoma persoonii</i>                 | 100 $\mu$ M            | Induced production of cytosporone R (380). Enhanced production of cytosporones B (346), C (378) and E (379).                                                                                                                                                                                                                                                                                                                                                                                            | [128] |
| <i>Penicillium brevicompactum</i>           | 10 mM                  | Enhanced production of anthranilic acid (381) and ergosterol peroxide (382).                                                                                                                                                                                                                                                                                                                                                                                                                            | [129] |
| <i>Phomopsis</i> sp. XP-8                   | 1 mM                   | Decreased production of pinoresinol (383), pinoresinol monoglucoside (384), pinoresinol diglucoside (385).                                                                                                                                                                                                                                                                                                                                                                                              | [130] |
| <i>Phomopsis asparagi</i><br>DHS-48         | 50 $\mu$ M             | Induced production of new compounds phaseolorin J (386) and phomoparagin D (387), along with known chromones phaseolorin D (388), chaetochromone B (389), and pleosporalin D (390), and cytochalasins J (391), J1 (392), J2 (393), J3 (394), H (395) and phomopchalsin D (396).                                                                                                                                                                                                                         | [131] |
| <i>Trichoderma harzianum</i><br>XS-20090075 | 10 $\mu$ M             | Induced production of three new terpenoids harzianolic acid (397), harzianone E (398) and 3,7,11-trihydroxy-cycloneran (399), together with 11 known sesquiterpenoids methyl 3,7-dihydroxy-15-cycloneranate (400), cateniolbin C (401), ascotrichic acid (402), cyclonerotriol (403), (10E)-12-acetoxy-10-cycloneran-3,7-diol (404), cyclonerodiol (405), cyclonerodiol oxide (406) and epicyclonerodiol oxide (407), ophioceric acid (408), <i>ent</i> -trichoacorenol (409) and trichoacorenol (410). | [132] |

**Table S6.** The examples of nicotinamide affecting production of fungal secondary metabolites.

| Fungal Species                   | Concentration of nicotinamide | Compounds Induced/Enhanced/Decreased                                                                                                                                                                                                                                                             | Ref.  |
|----------------------------------|-------------------------------|--------------------------------------------------------------------------------------------------------------------------------------------------------------------------------------------------------------------------------------------------------------------------------------------------|-------|
| <i>Chaetomium cancroideum</i>    | 50 µM                         | Enhanced production of five polyketides included chaetophenols B (293) and C (294), chaetophenol G (411), and cancolides A (412) and B (413).                                                                                                                                                    | [134] |
| <i>C. mollipilium</i>            | 100 µM                        | Induced production of new polyketides mollipilin A–E (414–418), along with two known compounds mollipilin F (419) and aureonitol (420).                                                                                                                                                          | [135] |
| <i>Eupenicillium</i> sp. LG41    | 1.5 mg/L                      | Induced production of two decalin-containing compounds eupenicinols C (421) and D (422) along with their biosynthetic precursors, eujavanicol A (423) and eupenicinicol A (424).                                                                                                                 | [136] |
| <i>Fusarium graminearum</i>      | 500 µg/mL                     | Decreased production of ergosterol peroxide (382) and deoxynivalenol (425).                                                                                                                                                                                                                      | [137] |
| <i>Graphiopsis chlorocephala</i> | 10 µM                         | Induced production of benzophenones cephalanones A–F (426–431) and 2-(2,6-dihydroxy-4-methylbenzoyl)-6-hydroxybenzoic acid (432).                                                                                                                                                                | [138] |
| <i>Penicillium brasilianum</i>   | 100 µM                        | Decreased production of brasiliamide A (261), verruculogen TR2 (262), and penicillic acid (162).                                                                                                                                                                                                 | [27]  |
| <i>P. brevicompactum</i>         | 100 µM                        | Induced production of phenolic metabolites: <i>p</i> -hydroxybenzaldehyde (359), phenyl acetic acid (360), <i>p</i> -anisic acid (433), <i>p</i> -anisic acid methyl ester (434), benzyl anisate (435), syringic acid (436), sinapic acid (437), acetosyringone (438), and gentisaldehyde (439). | [129] |

**Table S7.** The examples of other histone deacetylase modifiers affecting production of fungal secondary metabolites.

| Modifier and Its Concentration      | Fungal Species                            | Compounds Induced/Enhanced/Decreased                                                                                                                                                                                                                         | Ref.  |
|-------------------------------------|-------------------------------------------|--------------------------------------------------------------------------------------------------------------------------------------------------------------------------------------------------------------------------------------------------------------|-------|
| Dihydrocoumarin, 5 mM               | <i>Monascus ruber</i> M7                  | Increased production of monasfluol B ( <b>452</b> ), acetyl-monasfluol B ( <b>453</b> ) and azaphilone C ( <b>454</b> ). Decreased production of citrinin ( <b>455</b> ).                                                                                    | [45]  |
| Entinostat, 500 µM                  | <i>Hypomyces</i> sp. CLG4                 | Induced production of (3 <i>R</i> )-6-hydroxymellein ( <b>154</b> ), (3 <i>R</i> )-6-methoxymellein ( <b>157</b> ), 6-demethylkigelin ( <b>456</b> ), (3 <i>R</i> )-6,7-dimethoxymellein ( <b>457</b> ), pyrolin ( <b>458</b> ), and terrain ( <b>459</b> ). | [141] |
| 2-Hexyl-4-pentynoic acid, 37.5 mg/L | <i>Aspergillus versicolor</i>             | Increased production of diorcinol ( <b>53</b> ), curvularin ( <b>460</b> ), and cyclo-(L-Trp-L-Phe) ( <b>461</b> ).                                                                                                                                          | [48]  |
| Octanoylhydroxamic acid, 500 µM     | <i>Drechslera</i> sp.                     | Increased production of benzophenone ( <b>366</b> ).                                                                                                                                                                                                         | [40]  |
| Quercetin, 100 µM                   | <i>Aspergillus amstelodami</i> VR177L     | Induced production of vinblastine ( <b>462</b> ).                                                                                                                                                                                                            | [142] |
| Quercetin, 100 µM                   | <i>Penicillium concavoradulozum</i> VE89L | Induced production of vinblastine ( <b>462</b> ).                                                                                                                                                                                                            | [142] |



**Table S8.** The examples of two types of chemical epigenetic modifiers affecting production of fungal secondary metabolites.

| Fungal Species                    | Modifier ant Its Concentration | Compounds Induced/Enhanced/Decreased                                                                                                                                                                                                                                                                                                                                                                                                                                                                                                                                                                                                                                                                                                                        | Ref.  |
|-----------------------------------|--------------------------------|-------------------------------------------------------------------------------------------------------------------------------------------------------------------------------------------------------------------------------------------------------------------------------------------------------------------------------------------------------------------------------------------------------------------------------------------------------------------------------------------------------------------------------------------------------------------------------------------------------------------------------------------------------------------------------------------------------------------------------------------------------------|-------|
| <i>Alternaria</i> sp.             | 5-Aza (250 µM) + SAHA (500 µM) | Induced production of alternariol (26), alternariol-5- <i>O</i> -methyl ether (27), 3'-hydroxyalternariol-5- <i>O</i> -methyl ether (28), altenusin (29), tenuazonic acid (30), and altertoxin II (31).                                                                                                                                                                                                                                                                                                                                                                                                                                                                                                                                                     | [51]  |
| <i>Aspergillus</i> sp.<br>SCSIOW2 | 5-Aza (1 mM) + SBHA (1 mM)     | Induced production of three new eremophilane-type sesquiterpenes, dihydrobipolaroxin B (487), dihydrobipolaroxin C (488), and dihydrobipolaroxin D (489), along with one known analogue, dihydrobipolaroxin (490).                                                                                                                                                                                                                                                                                                                                                                                                                                                                                                                                          | [146] |
| <i>Aspergillus</i> sp.<br>SCSIOW3 | 5-Aza (1 mM) + SBHA (1 mM)     | Induced production of one new diphenylether- <i>O</i> -glycoside namely diorcinol 3- <i>O</i> - $\alpha$ -D-ribofuranoside (491), along with seven known compounds (7 <i>S</i> )-sydonic acid (33), ( <i>S</i> )-sydowic acid (37), diorcinal (492), 3,3'-dihydroxy-5,5'-dimethyldibenzofuran (493), cordyol (494), gibellulin B (495), and cyclo-(L-Trp-L-Phe) (496).                                                                                                                                                                                                                                                                                                                                                                                      | [147] |
| <i>Aspergillus clavatus</i>       | GlcNAc (0.5 µM) + NaBut (9 µM) | Increased production of pseurotin A (40).                                                                                                                                                                                                                                                                                                                                                                                                                                                                                                                                                                                                                                                                                                                   | [25]  |
| <i>Aspergillus fumigatus</i>      | 5-Aza (500 µM) + SBHA (500 µM) | Induced production of ten alkaloids: 3-dehydroxymethylbisdehydro-3,10a-bis(methylthio) gliotoxin (497), bisdehydrobis (methylthio) gliotoxin (498), fumitremorgin C (499), fumiquinazoline J (500), pyripyropene A (501), chaetominine (502), fumigaclavine A (503), 9-deacetyfumigaclavine C (504), fumigaclavine C (505), and 3-hydroxyacetyl indole (506); six polyketides: helvolinic acid (507), rhizoctonic acid (508), monomethylsulochrin (509), 3-hydroxy-1,6-dimethoxy-8-methyl 9 <i>H</i> -xanthen-9-one (510), questin (511) and 6-hydroxy-8-methoxy-3-methylisocoumarin (512); and three benzene derivatives: circinoporin acid (513), koaburaside (514), and methyl shikimate (515).                                                          | [148] |
| <i>Aspergillus versicolor</i>     | 5-Aza (100 µM) + SAHA (100 µM) | Induced production of two new nucleoside derivatives, kipukasins K (516) and L (517), and one new bisabolane sesquiterpene, aspergillusene E (518), along with four known nucleoside derivatives, kipukasin I (519), kipukasin H (520), kipukasin D (521), and kipukasin E (522), and ten known bisabolane sesquiterpenes, (7 <i>R</i> )-hydroxysydonic acid (32), (7 <i>S</i> )-sydonic acid (33), ( <i>E</i> )-5-(hydroxymethyl)-2-(6'-methylhept-2'-en-2'-yl)phenol (523), ( <i>Z</i> )-5-(hydroxymethyl)-2-(6'-methylhept-2'-en-2'-yl)phenol (524), 7-deoxy-7,14-didehydroxydonol (525), (7 <i>R</i> )-sydonol (526), (7 <i>R</i> )-methoxysydonol (527), (7 <i>S</i> )-sydonol (47), (7 <i>S</i> )-methoxysydonol (528), and aspergiterpenoid A (529). | [149] |
| <i>Eutypella</i> sp.              | 5-Aza (1 mM) + SBHA (1 mM)     | Induced production of 21 sesquiterpenes including 17 undescribed eutypeterpenes A-Q (530–546), four known sesquiterpenes: xylariterpenoids A (547) and B (548),                                                                                                                                                                                                                                                                                                                                                                                                                                                                                                                                                                                             | [150] |



|                                    |                                 |                                                                                                                                                                                                                                                                                                                                                                                      |       |
|------------------------------------|---------------------------------|--------------------------------------------------------------------------------------------------------------------------------------------------------------------------------------------------------------------------------------------------------------------------------------------------------------------------------------------------------------------------------------|-------|
|                                    |                                 | eudesma-3-en-11,15-diol (549), and eudesma-4-en-11,15-diol (550).                                                                                                                                                                                                                                                                                                                    |       |
| <i>Gibellula formosana</i>         | SBHA (1 mM) + RG-108 (1 mM)     | Induced production of two new highly oxidized ergosterols, formosterols A (551) and B (552), and five new isariotin analogs, 12'-O-acetylisariotin A (553), 1- <i>epi</i> -isariotin A (554), and isariotins K–M (555–557), together with six known compounds isariotin A (341), formosterol C (558), isariotin C (559), isariotin E (560), TK-57-164A (561), and beauvericin (562). | [38]  |
| <i>Isaria tenuipes</i>             | SBHA (500 µM) + RG-108 (500 µM) | Induced production of a novel polyketide tenuipyrone (563) along with two plausible precursors cephalosporolides B (564) and F (565) of tenuipyrone (563).                                                                                                                                                                                                                           | [151] |
| <i>Leucostoma persoonii</i>        | 5-Aza (50 µM) + NaBut (100 µM)  | Induced production of cytosporones B (346), C (378), E (379) and R (380).                                                                                                                                                                                                                                                                                                            | [128] |
| <i>Muscodora yucatanensis</i> Ni30 | 5-Aza (50 µM) + SAHA (50 µM)    | Enhanced production of ergosterol (104) and xylaguanol C (105).                                                                                                                                                                                                                                                                                                                      | [69]  |
| <i>Pestalotiopsis acaciae</i>      | 5-Aza (500 µM) + SAHA (500 µM)  | Induced production of three novel aromatic compounds: 20-hydroxy-6'-hydroxymethyl-4'-methylphenyl-2,6-dihydroxy-3-(2-isopentenyl)benzoate (566), 4,6-dihydroxy-7-hydroxymethyl-3-methylcoumarin (567) and 4,6-dihydroxy-3,7-dimethylcoumarin (568).                                                                                                                                  | [152] |
| <i>Ustilago maydis</i>             | 5-Aza (500 µM) + SBHA (500 µM)  | Induced production of ustilagic acids B (569) and C (570).                                                                                                                                                                                                                                                                                                                           | [153] |
| <i>Xylaria psidii</i>              | 5-Aza (5 µM) + SAHA (10 µM)     | Increased production of resveratrol (132).                                                                                                                                                                                                                                                                                                                                           | [75]  |
